# Supplementary material for: Hierarchical Reconfiguration of Interhemispheric Dialogue in Alzheimer’s Disease: A Multicenter Analysis
Source: Research Square preprint supplement (doi:10.21203/rs.3.rs-8313664/v1), 2025-12-15
Supplement: Supplementary file 1 [file f98cda695ea5027708a2ab4a.pdf]

|                                                                                                                                                                                 |    |
|---------------------------------------------------------------------------------------------------------------------------------------------------------------------------------|----|
| <b>Supplementary Results</b>                                                                                                                                                    | 2  |
| Alterations in AI of structural morphological metrics in AD.....                                                                                                                | 2  |
| Alterations in HFC and the AI of structural morphological metrics in MCI.....                                                                                                   | 2  |
| Model performance under different feature selection schemes in classification task distinguishing AD from MCI. ....                                                             | 2  |
| Model performance under different feature selection schemes in prediction clinical cognitive scores for AD and MCI. ....                                                        | 3  |
| <b>Supplementary Figures</b>                                                                                                                                                    | 3  |
| Supplementary Figure 1. Original asymmetry index and brain regions of group difference with significant lateralization in GMV.....                                              | 3  |
| Supplementary Figure 2. Original asymmetry index and brain regions of group difference with significant lateralization in FD.....                                               | 4  |
| Supplementary Figure 3. Original asymmetry index and brain regions of group difference with significant lateralization in CT.....                                               | 4  |
| Supplementary Figure 4. Original asymmetry index and brain regions of group difference with significant lateralization in GI.....                                               | 5  |
| Supplementary Figure 5. Original asymmetry index and brain regions of group difference with significant lateralization in SD.....                                               | 5  |
| Supplementary Figure 6. Gene analysis results for group difference pattern of HFC between AD and MCI.....                                                                       | 6  |
| Supplementary Figure 7. Model performance under different feature selection schemes in classification task distinguishing AD from MCI.....                                      | 7  |
| Supplementary Figure 8. Model performance under different feature selection schemes based on differences between AD and MCI in prediction of the clinical cognitive scores..... | 8  |
| <b>Supplementary Tables</b>                                                                                                                                                     | 9  |
| Supplementary Table S1. Brain regions of group difference with significant lateralization in GMV after FDR correction. ....                                                     | 9  |
| Supplementary Table S2. Brain regions of group difference with significant lateralization in FD after FDR correction. ....                                                      | 9  |
| Supplementary Table S3. Brain regions of group difference with significant lateralization in CT after FDR correction. ....                                                      | 9  |
| Supplementary Table S4. Brain regions of group difference with significant lateralization in GI after FDR correction. ....                                                      | 9  |
| Supplementary Table S5. Brain regions of group difference with significant lateralization in SD after FDR correction.....                                                       | 10 |
| Supplementary Table S6. Detailed statistical results of gene expression for AD VS. NC. ....                                                                                     | 10 |
| Supplementary Table S7. Detailed statistical results of gene expression for AD VS. MCI.....                                                                                     | 11 |
| Supplementary Table S8. The statistical results of the classification between AD and NC for each site.....                                                                      | 11 |
| Supplementary Table S9. The statistical results of the classification between AD and MCI for each site. ....                                                                    | 11 |
| Supplementary Table S10. The statistical results of the prediction between AD and NC for each site. ....                                                                        | 11 |
| Supplementary Table S11. The statistical results of the prediction between AD and MCI for each site.....                                                                        | 12 |
| Supplementary Table S12. Brainnetome atlas.....                                                                                                                                 | 12 |

## Supplementary Results

### 1. Alterations in AI of structural morphological metrics in AD.

Compared the gray matter volume asymmetry index (AI) across multiple brain regions among patients with Alzheimer's Disease (AD), Mild Cognitive Impairment (MCI), and Normal Control (NC) subjects. Statistical analyses (FDR-corrected) revealed that the AD group exhibited significant alterations in AI compared to the NC group in numerous brain regions, with effect sizes (Cohen's  $d$ ) ranging from -0.548 to 0.720. Specifically, within the frontal lobe, the AD group showed significant differences in the inferior frontal gyrus, opercular part (IFG, A44op, Cohen's  $d$  = -0.359,  $p$ -FDR < 0.001) and the middle orbital gyrus (OrG, A14m, Cohen's  $d$  = 0.321,  $p$ -FDR = 0.003). In the temporal lobe, significant differences between AD and NC were identified in several regions, including the superior temporal gyrus (STG, A22c, Cohen's  $d$  = -0.548,  $p$ -FDR = 0.003), inferior temporal gyrus (ITG, A20iv, Cohen's  $d$  = -0.243,  $p$ -FDR = 0.041), fusiform gyrus (FuG, A37lv, Cohen's  $d$  = 0.272,  $p$ -FDR = 0.027), and parahippocampal gyrus (PhG, A35\_36r). Notably, the posterior superior temporal sulcus (PSTS, cpSTS, Cohen's  $d$  = -0.361,  $p$ -FDR = 0.050) and the postcentral gyrus (PoG, A2, Cohen's  $d$  = -0.237,  $p$ -FDR = 0.047) demonstrated significant alterations not only in the AD vs. NC comparison but also in the direct comparison of AD vs. MCI. Among the subcortical nuclei, the most pronounced difference was observed in the hippocampus (Hipp, cHipp), which yielded a large positive effect size (Cohen's  $d$  = 0.720,  $p$ -FDR < 0.001) in the AD-NC comparison and a medium-to-large effect (Cohen's  $d$  = 0.560,  $p$  = 0.002) in the AD and MCI comparison. Furthermore, two subregions of the thalamus (PPtha and Otha) also showed significant differences between AD and NC groups (For PPtha: Cohen's  $d$  = 0.438,  $p$ -FDR = 0.027; For Otha: Cohen's  $d$  = 0.428,  $p$ -FDR = 0.003). No brain regions showed significant differences in GMV between the MCI and NC groups, after FDR correction.

For AI of FD, AD showed only three brain regions with significant differences, compared to NC. Specifically, within the temporal lobe, the superior temporal gyrus (STG, A22c and A22r, Supplementary Fig. 2 and Supplementary Table 2) exhibited a rightward asymmetry, with a negative effect size (For A22c: Cohen's  $d$  = -0.394,  $p$ -FDR = 0.032; For A22r: Cohen's  $d$  = -0.355,  $p$ -FDR = 0.022), respectively. In contrast, the parahippocampal gyrus (PhG, A35\_36r) in the temporal lobe showed a leftward asymmetry, with a positive effect size (Cohen's  $d$  = 0.526,  $p$ -FDR < 0.001). In the comparison between the AD and MCI groups, significant differences were observed in more regions. Within the frontal lobe, the orbital gyrus (OrG, A11l) and paracentral lobule (PCL, A41l) both showed a leftward asymmetry, with a significant positive effect size (For A11l: Cohen's  $d$  = 0.292,  $p$ -FDR = 0.040; For A41l: Cohen's  $d$  = 0.359,  $p$ -FDR = 0.005). Furthermore, other regions—including the temporal lobe (STG A22c and PhG A37lv), limbic lobe (CG A23v), and occipital lobe (MVOCC vmPOS)—generally showed a greater rightward asymmetry. No brain regions showed significant differences in FD between the MCI and NC groups, after FDR correction.

For AI of CT, there were 4 regions showed significant group differences between AD and NC, after FDR correction. There were Inferior Frontal gyrus and Orbital gyrus. All of them showed exhibited a significant increase in rightward asymmetry in AD, with a significant negative effect (Supplementary Fig. 3 and Supplementary Table 3; For A44op: Cohen's  $d$  = -0.299,  $p$ -FDR = 0.022; For A14m: Cohen's  $d$  = -0.326,  $p$ -FDR = 0.020; For A11l: Cohen's  $d$  = -0.360,  $p$ -FDR = 0.013; For A12\_47l: Cohen's  $d$  = -0.298,  $p$ -FDR = 0.039). No brain regions showed significant differences in CT between the AD and MCI groups, after FDR correction. No brain regions showed significant differences in CT between the MCI and NC groups, after FDR correction.

For AI of GI, there was only one single brain region left after FDR correction in the comparison between AD and NC groups. This region was the superior temporal gyrus (Supplementary Fig. 4 and Supplementary Table 4; STG, A31l), which exhibited a significant increase in rightward asymmetry in AD, with a significant negative effect (Cohen's  $d$  = -0.320,  $p$ -FDR = 0.026). No brain regions showed significant differences in GI between the AD and MCI groups, after FDR correction. No brain regions showed significant differences in GI between the MCI and NC groups, after FDR correction.

For AI of SD, there was only one single brain region left after FDR correction between AD and NC groups. This region was the superior parietal gyrus (SPL, A7c; Supplementary Fig. 5 and Supplementary Table 5), which exhibited a significant decrease in leftward asymmetry in AD, with a significant negative effect (Cohen's  $d$  = -0.331,  $p$ -FDR = 0.016, Supplementary Fig. 5 and Supplementary Table 5). No brain regions showed significant differences in SD between the AD and MCI groups, after FDR correction. No brain regions showed significant differences in SD between the MCI and NC groups, after FDR correction.

### 2. Alterations in HFC and the AI of structural morphological metrics in MCI.

There were no significant differences between MCI and HC in the HFC after FDR correction, as showed in Figure 2d. There was no region showed significant group differences between MCI and HC in AI of any of structural morphological metrics, after FDR correction, as showed in Supplementary Figure 1d, Supplementary Figure 2d, Supplementary Figure 3d, Supplementary Figure 4d and Supplementary Figure 5d.

### 3. Model performance under different feature selection schemes in classification task distinguishing AD from MCI.

In the binary classification task distinguishing AD from MCI, the HFC represents a robust neuroimaging biomarker. Specifically, the model utilizing whole-brain HFC features achieved an averaged ACC of 0.653 via leave-one-site out cross-validation (Supplementary Fig. 7c). The HFC showed the highest accuracy (ACC = 0.653) among all single-modality models, outperforming all structural morphological metrics including GMV (ACC = 0.624), FD (ACC = 0.571), CT (ACC = 0.596), GI (ACC = 0.530), SD (ACC = 0.517). When utilizing regions with significant alteration of HFC both after FDR corrected or not in either AD group or MCI groups as features, the model's accuracy remained essentially constant, exhibiting only a marginal drop (For sig-brains: ACC = 0.621; For FDR-brains: ACC = 0.613) (Supplementary Fig. 7c). This trend was consistent for both F1 score and AUC (Supplementary Fig. 7c). During leave-one-site-out cross-validation, the model achieved site-specific accuracies ranging from 0.507 to 0.800, indicating variable performance across data sources (Supplementary Fig. 7a). The evaluate metrics for each site could be seen in Supplement Table S9. The ROC curves of the model were shown in Supplementary Fig. 7b.

Like the classification task of distinguishing AD from NC, the integration the HFC features with the AI features of the structural metrics also enhanced classification performance with an average margin of 6.12% for structural metrics (Supplementary Fig. 7c), suggesting that functional network information can provide valuable complementary data for improving diagnostic accuracy.

#### 4. Model performance under different feature selection schemes in prediction clinical cognitive scores for AD and MCI.

HFC showed the potential as a robust neuroimaging biomarker to predict the clinical cognitive scores via leave-one-site-out cross-validation for AD and MCI. Specifically, the model utilizing whole-brain HFC as features achieved an average correlation of 0.288 between the predicted and actual MMSE scores via leave-one-site out cross-validation (Supplementary Fig. 8), outperforming the AI of several single-structural metrics including FD ( $r = 0.202$ ), GI ( $r = 0.147$ ) and SD ( $r = 0.101$ ). However, HFC showed lower predictive performances compared to GMV ( $r = 0.435$ ) and CT ( $r = 0.302$ ). Notably, the predictive performance remained stable when using only regions showing significant HFC alterations in AD or MCI. The correlation only marginally decreased when restricting features to FDR-corrected significant regions ( $r = 0.233$ ) or uncorrected significant regions ( $r = 0.241$ ), indicating the robustness of HFC features.

Consistent with the classification task, the integration of HFC with structural metrics through multi-modal fusion led to improved performance in classifying AD from MCI. Specifically, the fusion of HFC with GMV model achieved the highest performance ( $r = 0.492$ , MAE = 4.618, RMSE = 5.678), while the union of HFC with CT also showed noticeable improvement ( $r = 0.398$ , MAE = 4.897, RMSE = 6.049). For the structurally weaker metrics FD, GI, and SD, the incorporation of HFC features resulted in substantial performance gains, with correlation increases of approximately 0.1, confirming the complementary value of HFC in multi-modal frameworks. The site-specific performance variations and detailed evaluation metrics for each site are provided in Supplementary Table S11, with corresponding visualization in Supplementary Figure S8.

### Supplementary Figures

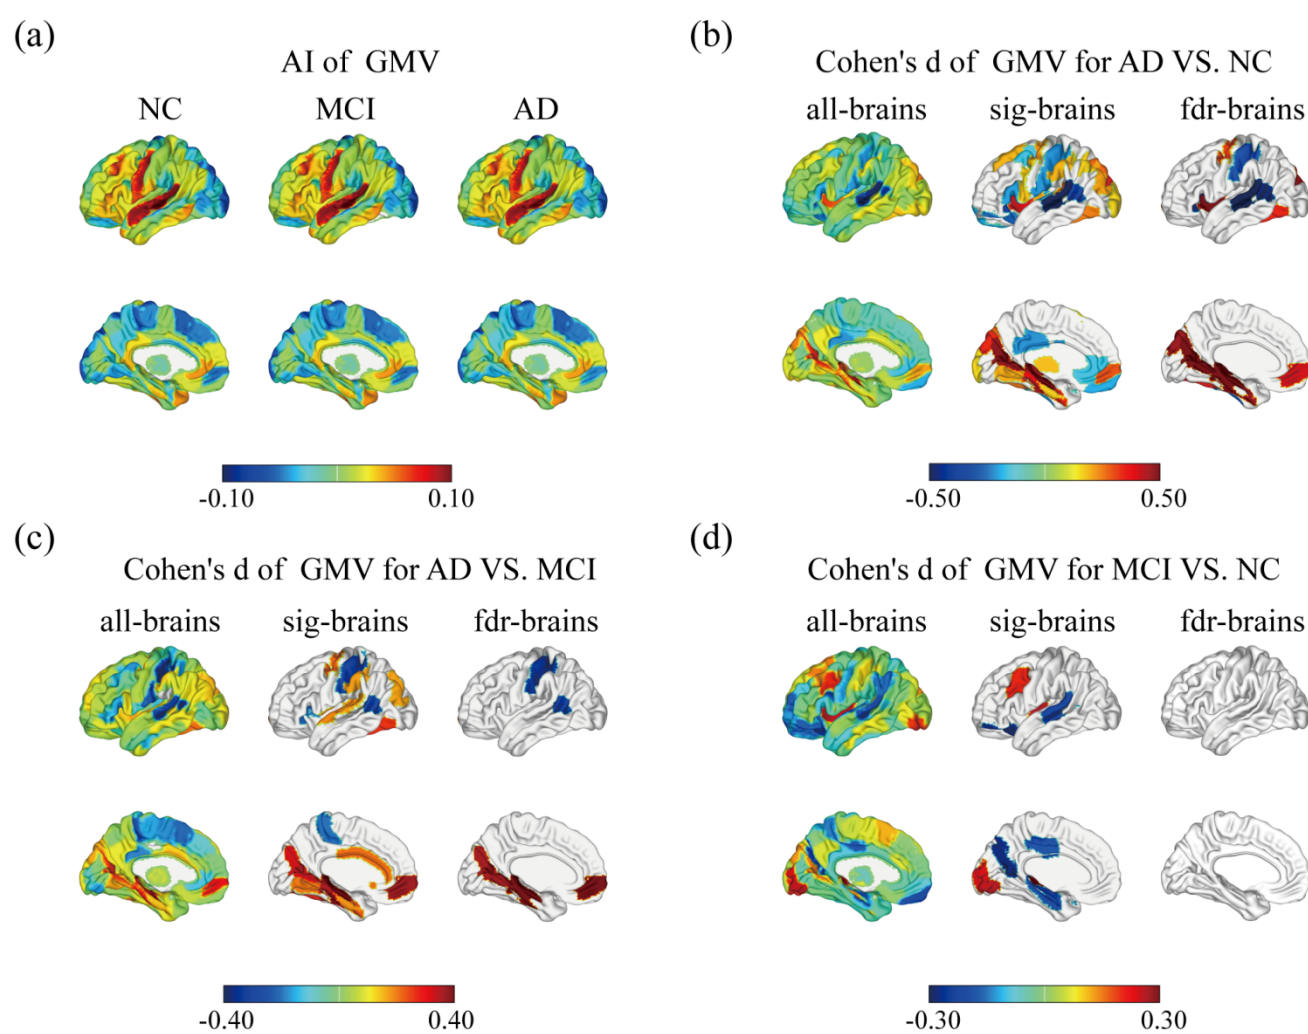

**Supplementary Figure 1. Original asymmetry index and brain regions of group difference with significant lateralization in GMV.** (a) AI of GMV among AD, MCI and NC. The results are projected onto homologous region pairs in a hemispheric view (left hemisphere illustrated as an example). Values on brain regions represent AI of GMV for each group. Larger AI reflecting greater leftward with warmer color. (b) The significant effect brain map of group difference in AD and NC with all brains, significant brains ( $p < 0.05$ ) and significant brains after FDR correction ( $p\text{-FDR} < 0.05$ ). (c) The significant effect brain map of group difference in AD and MCI with all brains, significant brains ( $p < 0.05$ ) and significant brains after FDR correction ( $p\text{-FDR} < 0.05$ ). (d) The significant effect brain map of group difference in MCI and NC with all brains, significant brains ( $p < 0.05$ ) and significant brains after FDR correction ( $p\text{-FDR} < 0.05$ ). Regions with statistically significant difference are highlighted, while gray areas denote non-significant regions. The color bar denotes positive Cohen's d effect size (warm tones: AD exhibits leftward AI) and negative Cohen's d effect size (cool tones: AD exhibits rightward AI).



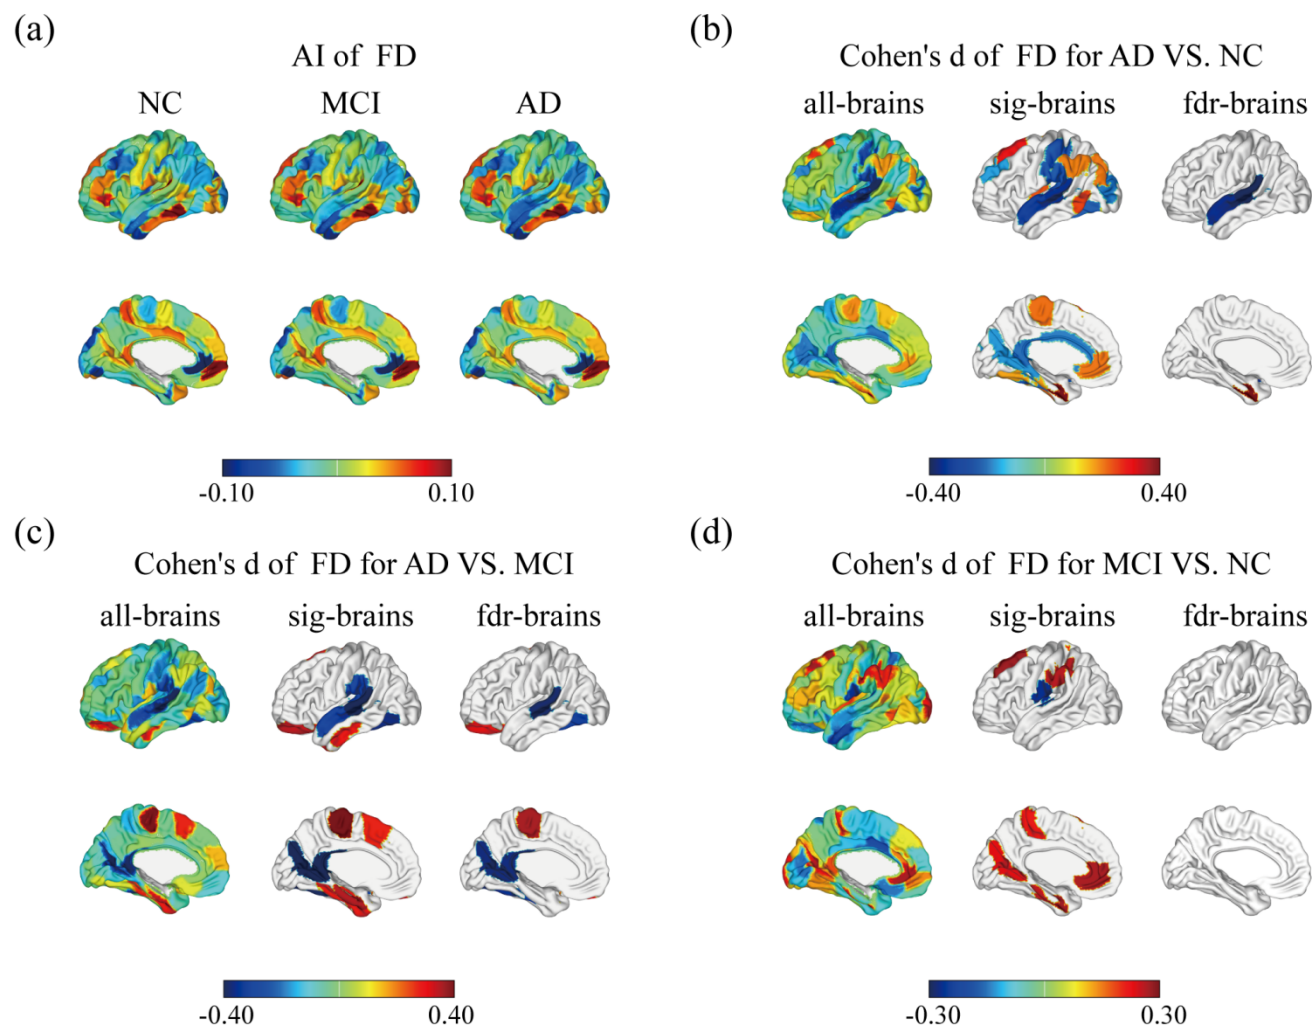

**Supplementary Figure 2. Original asymmetry index and brain regions of group difference with significant lateralization in FD.** (a) AI of FD among AD, MCI and NC. The results are projected onto homologous region pairs in a hemispheric view (left hemisphere illustrated as an example). Values on brain regions represent AI of FD for each group. Larger AI reflecting greater leftward with warmer color. (b) The significant effect brain map of group difference in AD and NC with all brains, significant brains ( $p < 0.05$ ) and significant brains after FDR correction ( $p\text{-FDR} < 0.05$ ). (c) The significant effect brain map of group difference in AD and MCI with all brains, significant brains ( $p < 0.05$ ) and significant brains after FDR correction ( $p\text{-FDR} < 0.05$ ). (d) The significant effect brain map of group difference in MCI and NC with all brains, significant brains ( $p < 0.05$ ) and significant brains after FDR correction ( $p\text{-FDR} < 0.05$ ). Regions with statistically significant difference are highlighted, while gray areas denote non-significant regions. The color bar denotes positive Cohen's d effect size (warm tones: AD exhibits leftward AI) and negative Cohen's d effect size (cool tones: AD exhibits rightward AI).

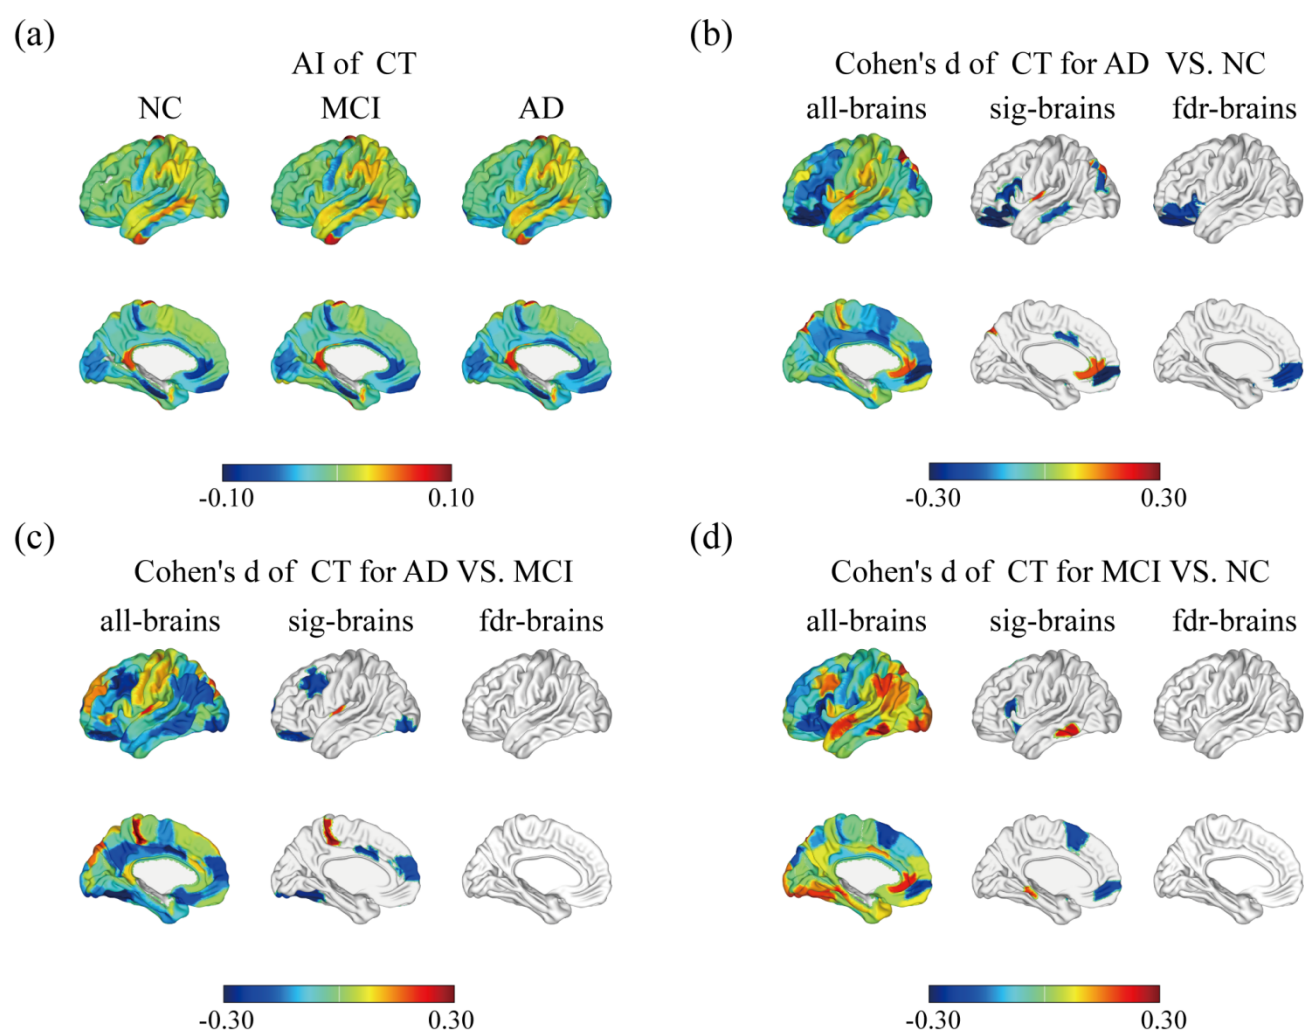

**Supplementary Figure 3. Original asymmetry index and brain regions of group difference with significant lateralization in CT.** (a) AI of CT among AD, MCI and NC. The results are projected onto homologous region pairs in a hemispheric view (left hemisphere illustrated as an example). Values on brain regions represent AI of CT for each group. Larger AI reflecting greater leftward with warmer color. (b) The significant effect brain map of group difference in AD and NC with all brains, significant brains ( $p < 0.05$ ) and significant brains after FDR correction ( $p\text{-FDR} < 0.05$ ). (c) The significant effect brain map of group difference in AD and MCI with all brains,

significant brains ( $p < 0.05$ ) and significant brains after FDR correction ( $p\text{-FDR} < 0.05$ ). (d) The significant effect brain map of group difference in MCI and NC with all brains, significant brains ( $p < 0.05$ ) and significant brains after FDR correction ( $p\text{-FDR} < 0.05$ ). Regions with statistically significant difference are highlighted, while gray areas denote non-significant regions. The color bar denotes positive Cohen's d effect size (warm tones: AD exhibits leftward AI) and negative Cohen's d effect size (cool tones: AD exhibits rightward AI).

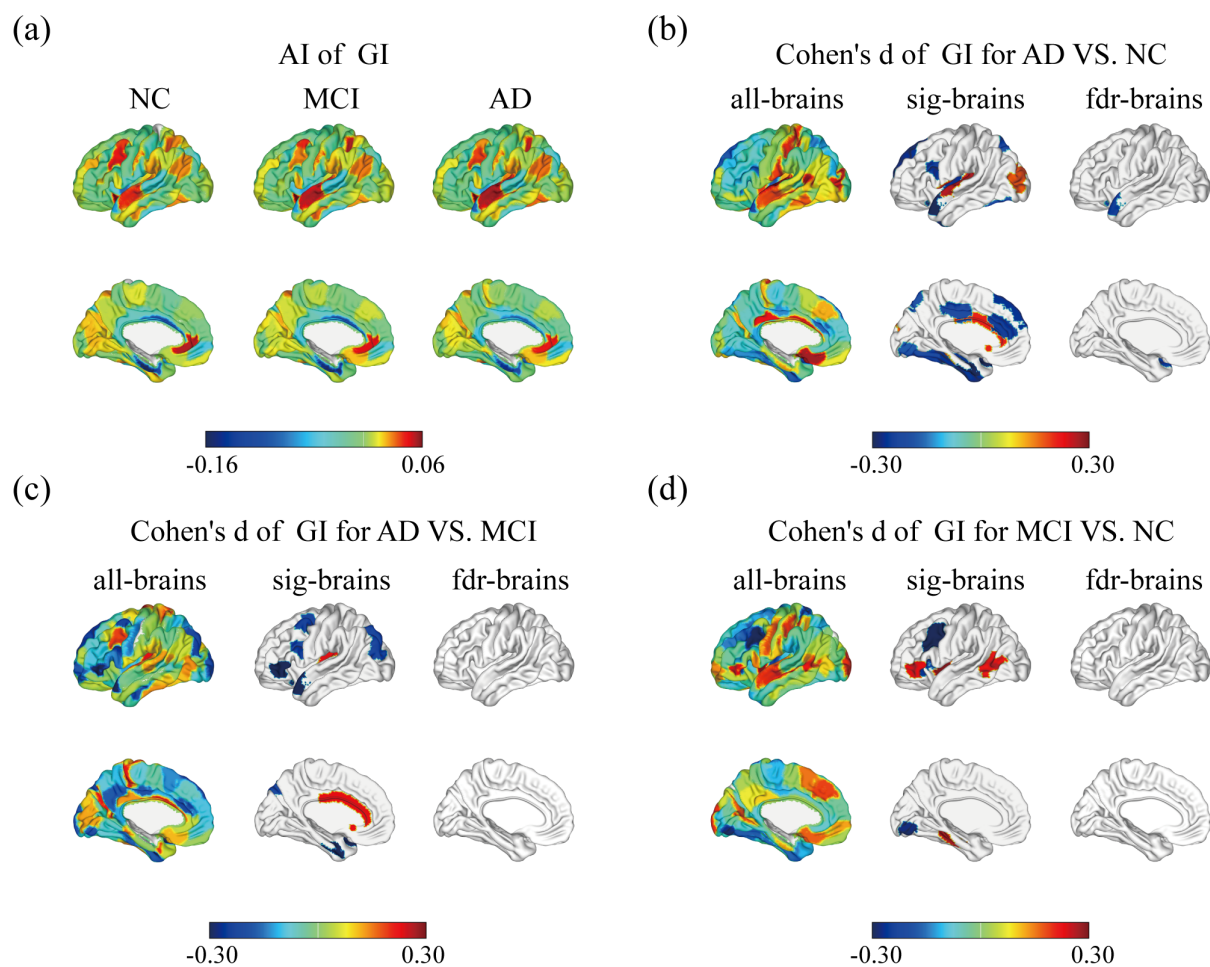

**Supplementary Figure 4. Original asymmetry index and brain regions of group difference with significant lateralization in GI.** (a) AI of GI among AD, MCI and NC. The results are projected onto homologous region pairs in a hemispheric view (left hemisphere illustrated as an example). Values on brain regions represent AI of GI for each group. Larger AI reflecting greater leftward with warmer color. (b) The significant effect brain map of group difference in AD and NC with all brains, significant brains ( $p < 0.05$ ) and significant brains after FDR correction ( $p\text{-FDR} < 0.05$ ). (c) The significant effect brain map of group difference in AD and MCI with all brains, significant brains ( $p < 0.05$ ) and significant brains after FDR correction ( $p\text{-FDR} < 0.05$ ). (d) The significant effect brain map of group difference in MCI and NC with all brains, significant brains ( $p < 0.05$ ) and significant brains after FDR correction ( $p\text{-FDR} < 0.05$ ). Regions with statistically significant difference are highlighted, while gray areas denote non-significant regions. The color bar denotes positive Cohen's d effect size (warm tones: AD exhibits leftward AI) and negative Cohen's d effect size (cool tones: AD exhibits rightward AI).

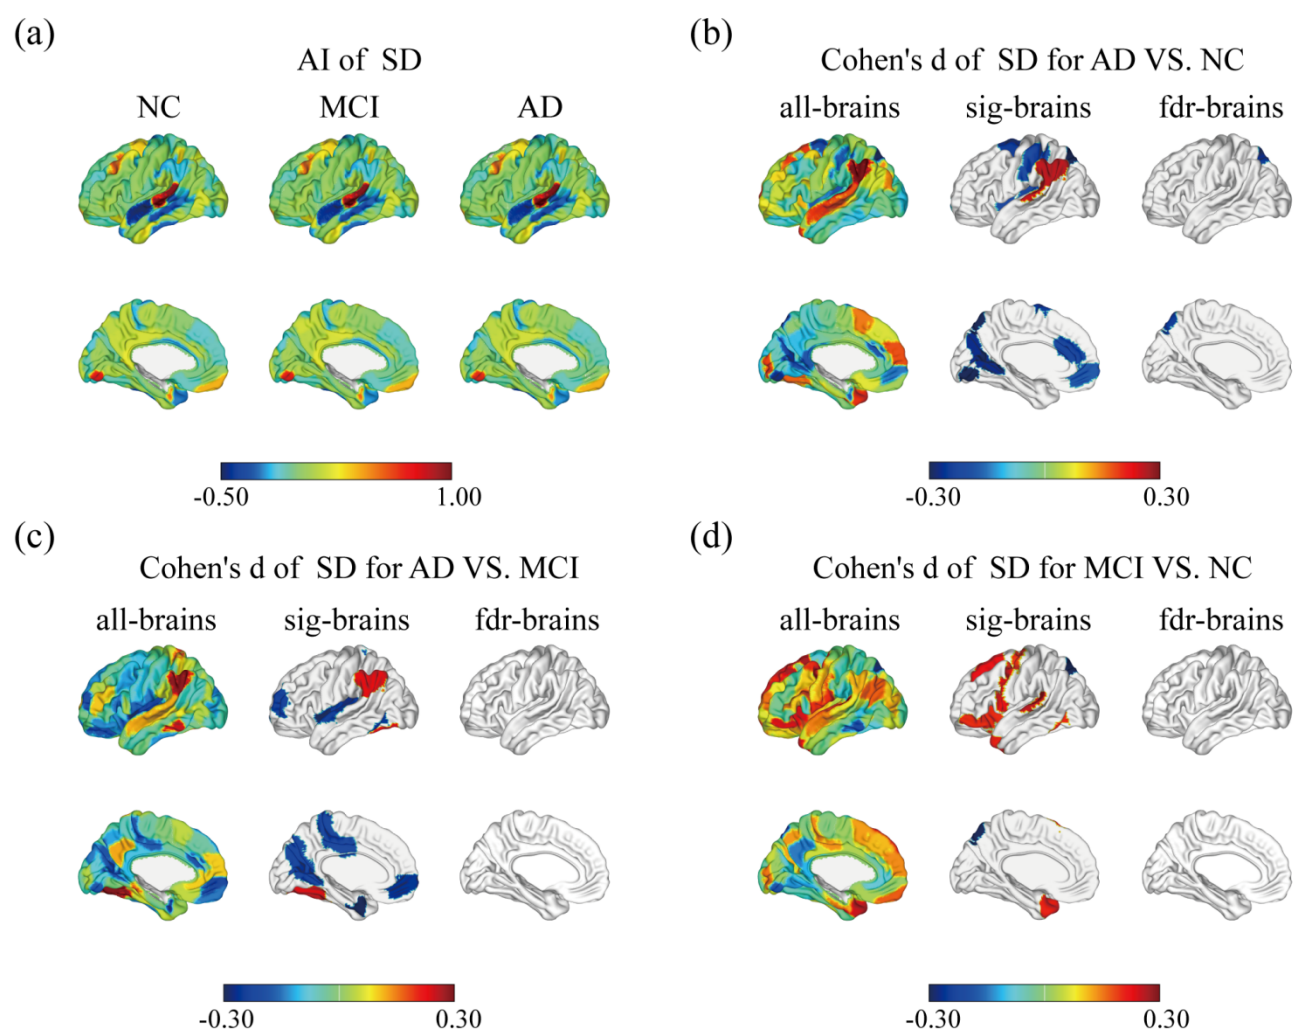

**Supplementary Figure 5. Original asymmetry index and brain regions of group difference with significant lateralization in SD.** (a) AI of SD among AD, MCI and NC. The results are projected onto homologous region pairs in a hemispheric view (left hemisphere illustrated as an example). Values on brain regions represent AI of SD for each group. Larger AI reflecting greater leftward with warmer

color. (b) The significant effect brain map of group difference in AD and NC with all brains, significant brains ( $p < 0.05$ ) and significant brains after FDR correction ( $p\text{-FDR} < 0.05$ ). (c) The significant effect brain map of group difference in AD and MCI with all brains, significant brains ( $p < 0.05$ ) and significant brains after FDR correction ( $p\text{-FDR} < 0.05$ ). (d) The significant effect brain map of group difference in MCI and NC with all brains, significant brains ( $p < 0.05$ ) and significant brains after FDR correction ( $p\text{-FDR} < 0.05$ ). Regions with statistically significant difference are highlighted, while gray areas denote non-significant regions. The color bar denotes positive Cohen's d effect size (warm tones: AD exhibits leftward AI) and negative Cohen's d effect size (cool tones: AD exhibits rightward AI).

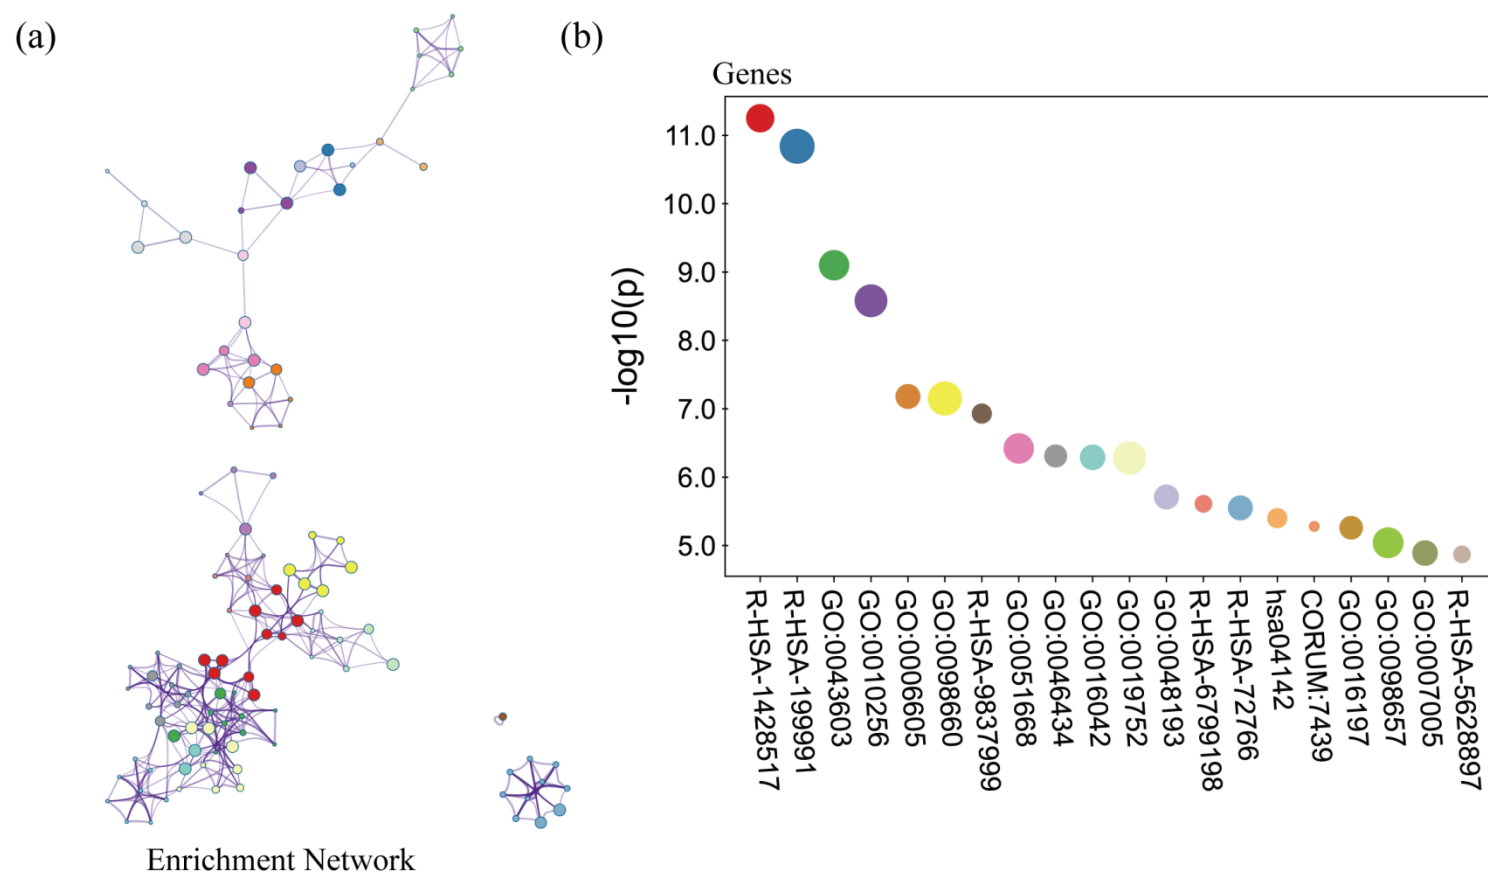

**Supplementary Figure 6. Gene analysis results for group difference pattern of HFC between AD and MCI.** (a) Gene enrichment network for strength pattern of HFC. (b) Top 20 clusters with their representative enriched terms (one per cluster). The circle size represents the number of genes involved in the specific term.



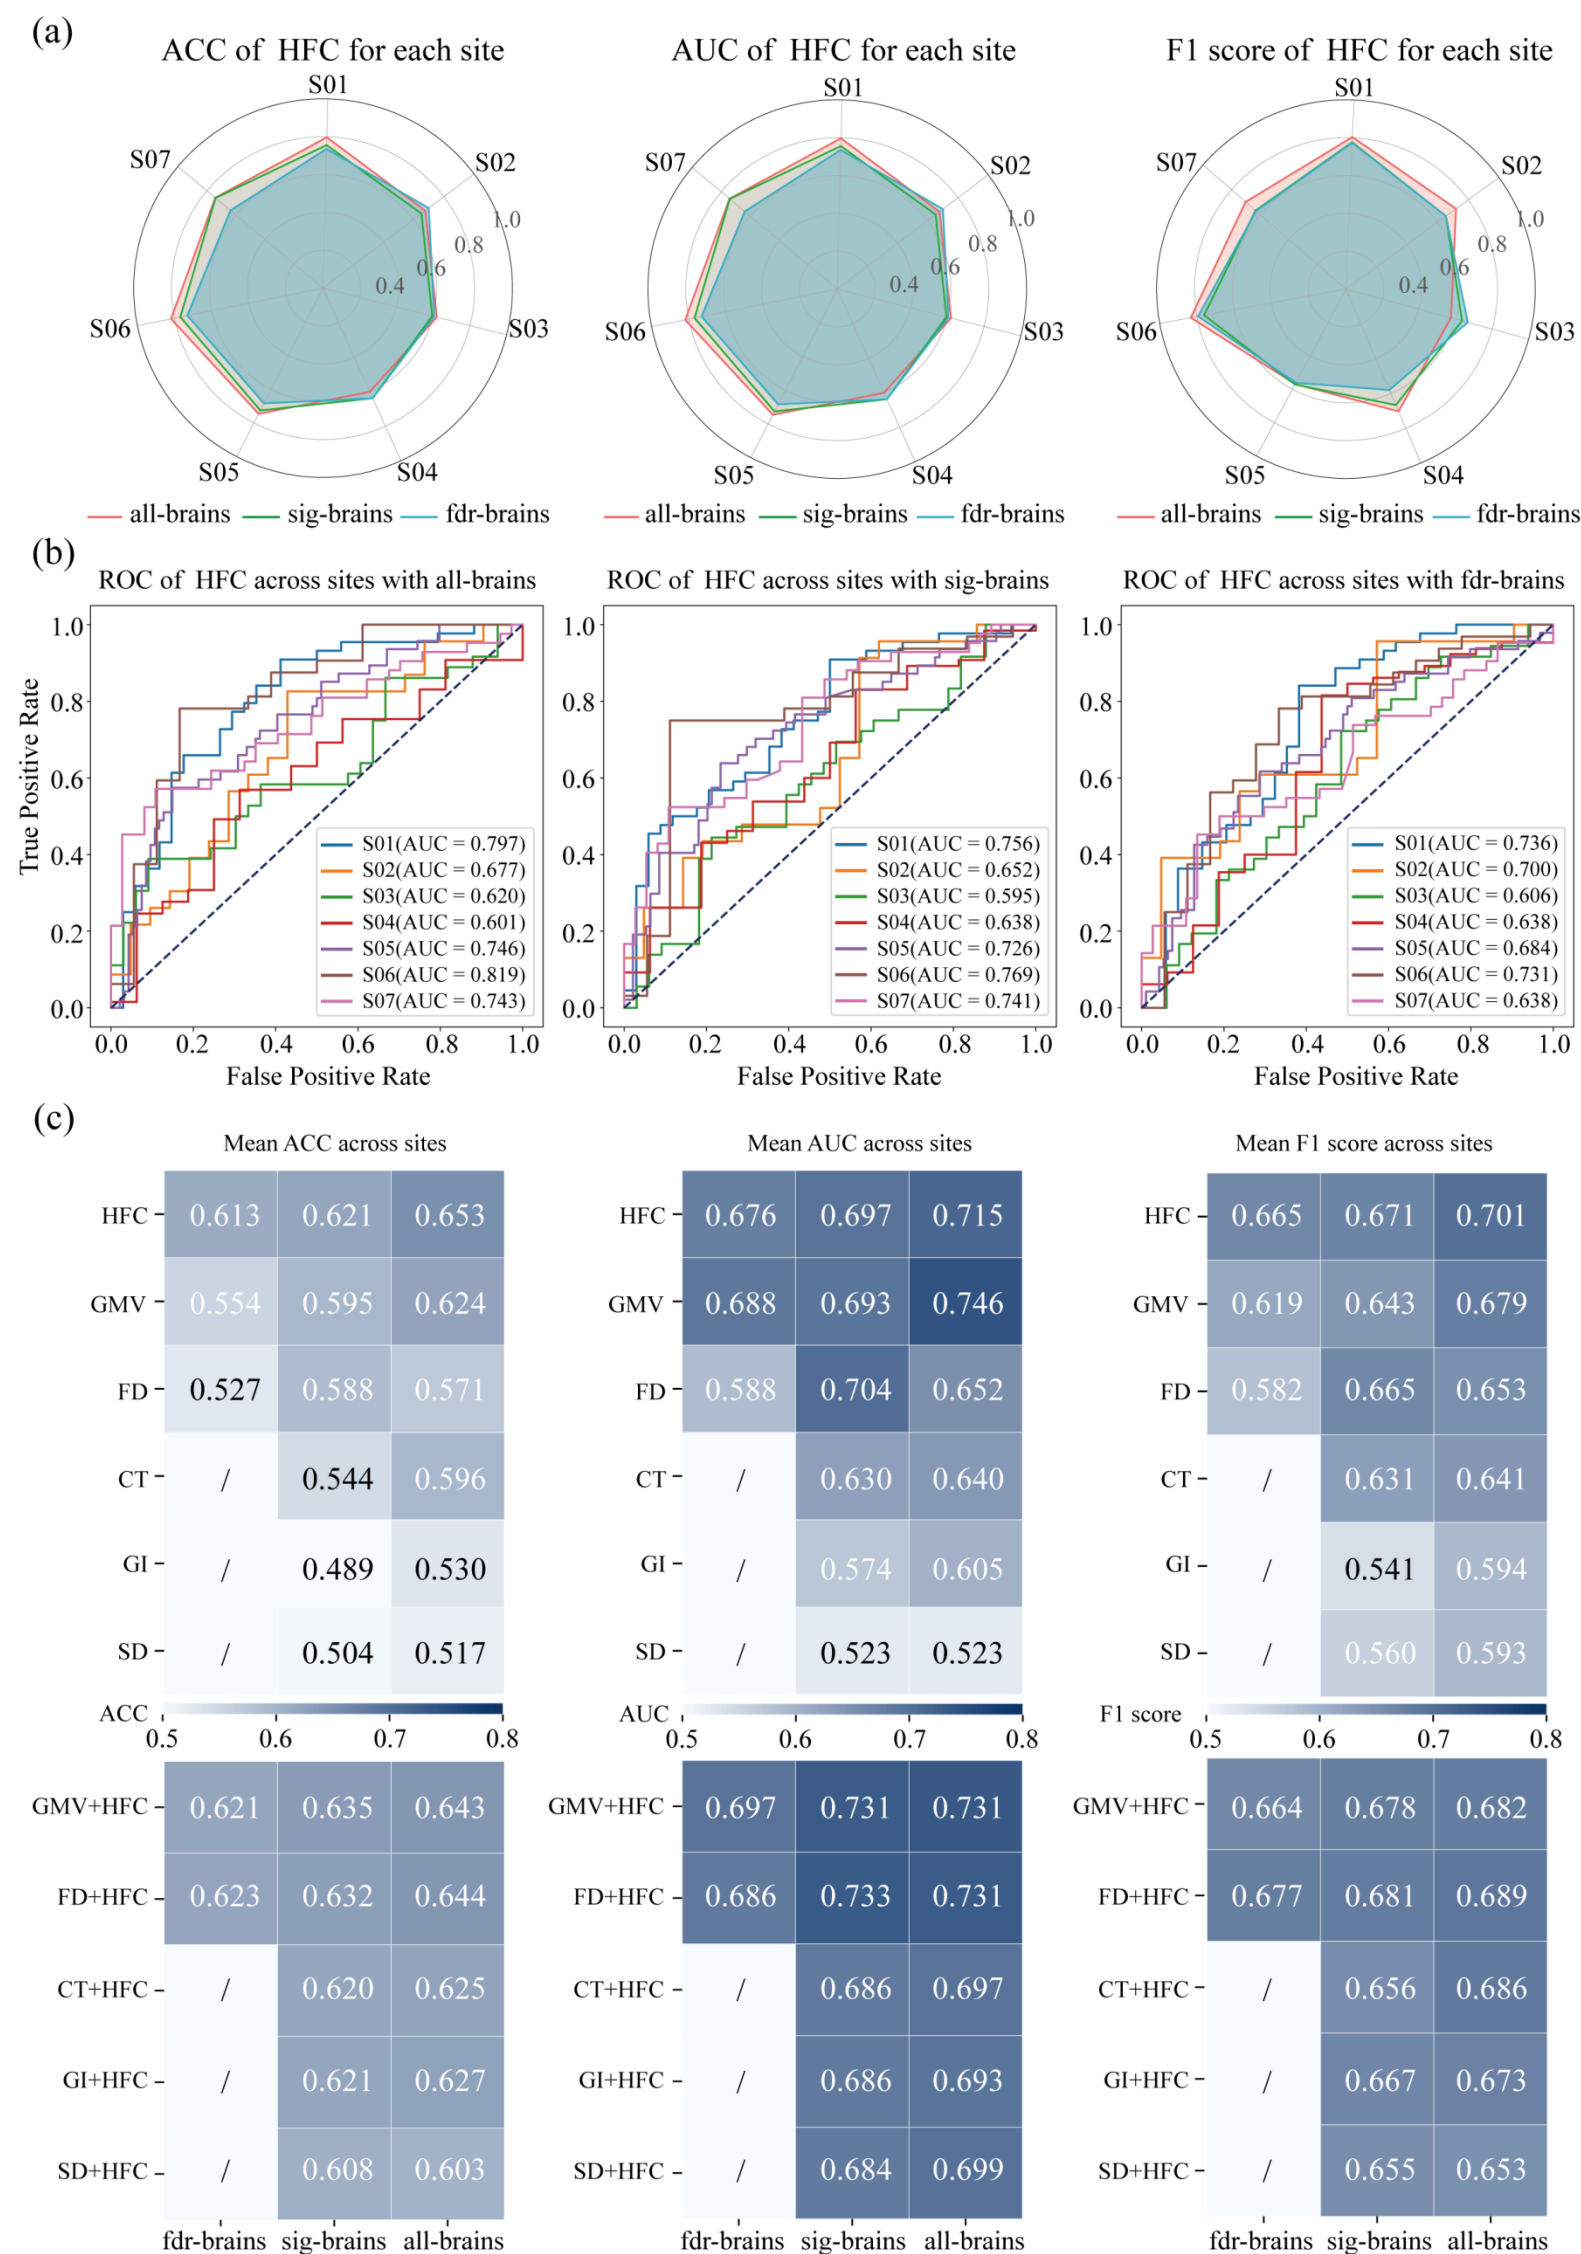

**Supplementary Figure 7. Model performance under different feature selection schemes in classification task distinguishing AD from MCI.** (a) Classification performance (ACC, AUC, and F1 score for each site). (b) ROC curve of the model with the features used the HFC across all brains, significant brains (sig-brains) and significant brains after FDR correction (FDR-brains). (c) Classification performance (site averaged ACC, AUC, and F1 score) across varying feature dimensions (x-axis) and metric combinations (y-axis). Empty cells (marked with "/") indicate no features selected under the corresponding metric. Darker hues in the color bar denote superior model performance in ACC, AUC and F1 score.

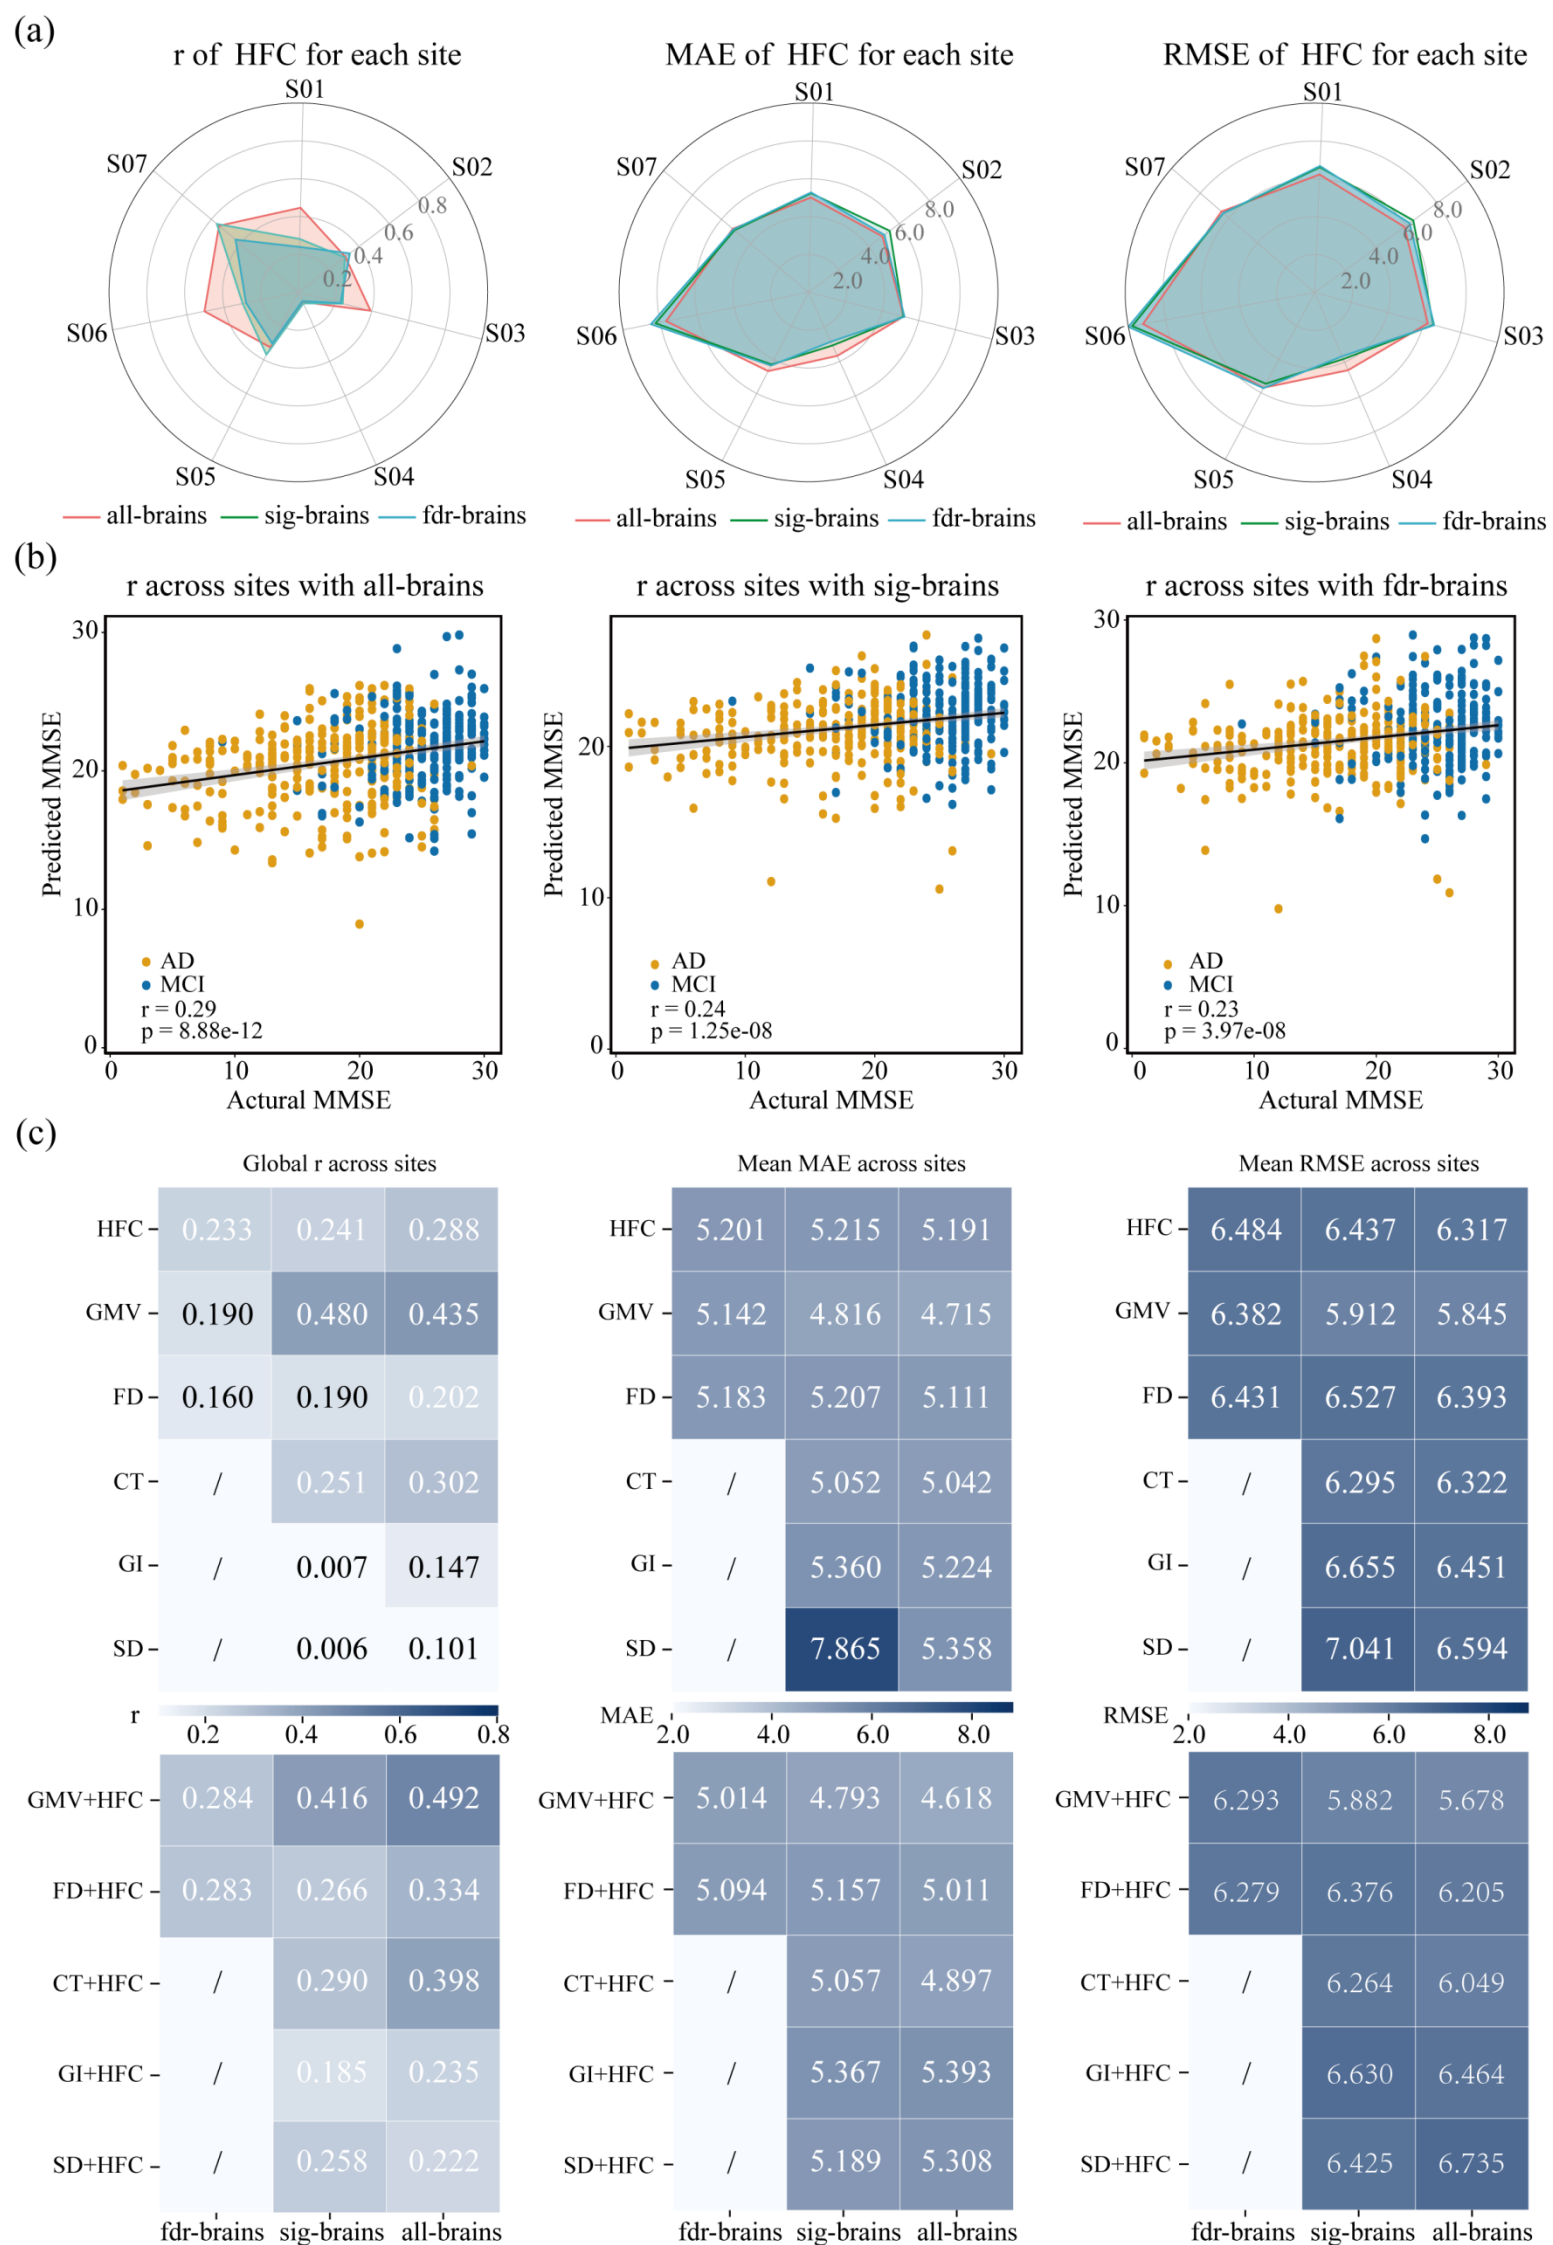

**Supplementary Figure 8. Model performance under different feature selection schemes based on differences between AD and MCI in prediction of the clinical cognitive scores.** (a) Prediction performance (r, MAE, and RMSE for each site). (b) Scatter plot of the model with the features used the HFC across all brains, significant brains (sig-brains) and significant brains after FDR correction (FDR-brains). (c) Prediction performance (site averaged r, MAE, and RMSE) across varying feature dimensions (x-axis) and metric combinations (y-axis). Empty cells (marked with "/") indicate no features selected under the corresponding metric. Darker hues in the color bar denote superior model performance in r while worse model performance in MAE and RMSE.



Supplementary Tables

Supplementary Table S1. Brain regions of group difference with significant lateralization in GMV after FDR correction.

| GMV                |       |         | NC      | MCI     | AD      | AD VS. NC |        | AD VS. MCI |       |
|--------------------|-------|---------|---------|---------|---------|-----------|--------|------------|-------|
| Lobe               | Gyrus | Region  | Mean AI | Mean AI | Mean AI | Cohen's d | p-FDR  | Cohen's d  | p-FDR |
| Frontal Lobe       | IFG   | A44op   | 0.039   | 0.026   | -0.004  | -0.359    | <0.001 | -          | -     |
|                    | OrG   | A14m    | -0.307  | -0.308  | -0.274  | 0.321     | 0.003  | 0.411      | 0.011 |
|                    | PrG   | A6cdl   | -0.331  | -0.331  | -0.299  | 0.247     | 0.037  | -          | -     |
| Temporal Lobe      | STG   | A22c    | 0.867   | 0.833   | 0.770   | -0.548    | 0.003  | -          | -     |
|                    | ITG   | A20iv   | 0.889   | 0.868   | 0.847   | -0.243    | 0.041  | -          | -     |
|                    | FuG   | A37lv   | 0.008   | 0.000   | 0.048   | 0.272     | 0.027  | -          | -     |
|                    |       | A35_36r | -0.017  | 0.009   | 0.069   | 0.372     | 0.004  | -          | -     |
|                    | PhG   | A35_36c | -0.153  | -0.149  | -0.088  | 0.501     | <0.001 | 0.486      | 0.002 |
|                    |       | TH      | -0.069  | -0.067  | -0.013  | 0.413     | <0.001 | 0.402      | 0.021 |
| Parietal Lobe      | pSTS  | cpSTS   | 0.237   | 0.221   | 0.179   | -0.361    | 0.050  | -0.287     | 0.021 |
|                    | PoG   | A2      | 0.091   | 0.097   | 0.056   | -0.237    | 0.047  | -0.336     | 0.005 |
| Insular Lobe       | INS   | dla     | 0.180   | 0.214   | 0.228   | 0.469     | <0.001 | -          | -     |
|                    |       | dld     | 0.167   | 0.195   | 0.209   | 0.427     | <0.001 | -          | -     |
| Occipital Lobe     | MVOcC | vmPOS   | -0.196  | -0.173  | -0.138  | 0.525     | <0.001 | 0.362      | 0.010 |
|                    | LOcC  | msOccG  | -0.235  | -0.189  | -0.190  | 0.369     | <0.001 | -          | -     |
| Subcortical Nuclei | Hipp  | cHipp   | -0.101  | -0.087  | -0.029  | 0.720     | <0.001 | 0.560      | 0.002 |
|                    | Tha   | PPtha   | 0.246   | 0.275   | 0.300   | 0.438     | 0.027  | -          | -     |
|                    |       | Otha    | 0.157   | 0.214   | 0.231   | 0.428     | 0.003  | -          | -     |

"Lobe" is the major lobe of the brain. "Gyrus" is the specific gyrus within the lobe. "Number" is the identifier for the brain region. "Mean AI" (NC, MCI, AD) means the average asymmetry index for each group. The effect size (Cohen's d) and the False Discovery Rate-adjusted p-FDR value for the comparison between groups. A dash (-) in the statistical columns indicates that the data is not applicable or not reported for that specific comparison.

Supplementary Table S2. Brain regions of group difference with significant lateralization in FD after FDR correction.

| FD             |       |         | NC      | MCI     | AD      | AD VS. NC |        | AD VS. MCI |       |
|----------------|-------|---------|---------|---------|---------|-----------|--------|------------|-------|
| Lobe           | Gyrus | Region  | Mean AI | Mean AI | Mean AI | Cohen's d | p-FDR  | Cohen's d  | p-FDR |
| Frontal Lobe   | OrG   | A11l    | -0.015  | -0.018  | -0.009  | -         | -      | 0.292      | 0.040 |
|                | PCL   | A4ll    | -0.037  | -0.041  | -0.023  | -         | -      | 0.359      | 0.005 |
| Temporal Lobe  | STG   | A22c    | 0.009   | -0.007  | -0.033  | -0.394    | 0.032  | -0.381     | 0.047 |
|                |       | A22r    | -0.014  | -0.033  | -0.046  | -0.355    | 0.022  | -          | -     |
|                | FuG   | A37lv   | -0.033  | -0.028  | -0.056  | -         | -      | -0.322     | 0.013 |
|                | PhG   | A35_36r | -0.093  | -0.074  | -0.049  | 0.526     | <0.001 | -          | -     |
| Limbic Lobe    | CG    | A23v    | 0.060   | 0.059   | 0.045   | -         | -      | -0.369     | 0.018 |
| Occipital Lobe | MVOcC | vmPOS   | 0.048   | 0.052   | 0.034   | -         | -      | -0.370     | 0.018 |

"Lobe" is the major lobe of the brain. "Gyrus" is the specific gyrus within the lobe. "Number" is the identifier for the brain region. "Mean AI" (NC, MCI, AD) means the average asymmetry index for each group. The effect size (Cohen's d) and the False Discovery Rate-adjusted p-FDR value for the comparison between groups. A dash (-) in the statistical columns indicates that the data is not applicable or not reported for that specific comparison.

Supplementary Table S3. Brain regions of group difference with significant lateralization in CT after FDR correction.

| CT           |       |         | NC      | MCI     | AD      | AD VS. NC |       |
|--------------|-------|---------|---------|---------|---------|-----------|-------|
| Lobe         | Gyrus | Region  | Mean AI | Mean AI | Mean AI | Cohen's d | p-FDR |
| Frontal Lobe | IFG   | A44op   | -0.016  | -0.022  | -0.028  | -0.299    | 0.022 |
|              |       | A14m    | 0.002   | -0.014  | -0.021  | -0.326    | 0.020 |
|              | OrG   | A11l    | -0.019  | -0.022  | -0.039  | -0.360    | 0.013 |
|              |       | A12_47l | 0.008   | 0.002   | -0.010  | -0.298    | 0.039 |

"Lobe" is the major lobe of the brain. "Gyrus" is the specific gyrus within the lobe. "Number" is the identifier for the brain region. "Mean AI" (NC, MCI, AD) means the average asymmetry index for each group. The effect size (Cohen's d) and the False Discovery Rate-adjusted (p-FDR) value for the comparison between groups. A dash (-) in the statistical columns indicates that the data is not applicable or not reported for that specific comparison.

Supplementary Table S4. Brain regions of group difference with significant lateralization in GI after FDR correction.

| GI            |       |        | NC      | MCI     | AD      | AD VS. NC |       |
|---------------|-------|--------|---------|---------|---------|-----------|-------|
| Lobe          | Gyrus | Region | Mean AI | Mean AI | Mean AI | Cohen's d | p-FDR |
| Temporal Lobe | STG   | A38l   | -0.063  | -0.063  | -0.087  | -0.320    | 0.026 |

"Lobe" is the major lobe of the brain. "Gyrus" is the specific gyrus within the lobe. "Number" is the identifier for the brain region. "Mean AI" (NC, MCI, AD) means the average asymmetry index for each group. The effect size (Cohen's d) and the False Discovery Rate-adjusted

p-FDR value for the comparison between groups. A dash (-) in the statistical columns indicates that the data is not applicable or not reported for that specific comparison.

Supplementary Table S5. Brain regions of group difference with significant lateralization in SD after FDR correction.

| SD            |       |        | NC      | MCI     | AD      | AD VS. NC |       |
|---------------|-------|--------|---------|---------|---------|-----------|-------|
| Lobe          | Gyrus | Region | Mean AI | Mean AI | Mean AI | Cohen's d | p-FDR |
| Parietal Lobe | SPL   | A7c    | 0.181   | 0.116   | 0.118   | -0.331    | 0.016 |

"Lobe" is the major lobe of the brain. "Gyrus" is the specific gyrus within the lobe. "Number" is the identifier for the brain region. "Mean AI" (NC, MCI, AD) means the average asymmetry index for each group. The effect size (Cohen's d) and the False Discovery Rate-adjusted p-FDR value for the comparison between groups. A dash (-) in the statistical columns indicates that the data is not applicable or not reported for that specific comparison.

Supplementary Table S6. Detailed statistical results of gene expression for AD VS. NC.

| GO            | Category                | Description                                                                | Count | %    | Log10(P) | Log10(q) |
|---------------|-------------------------|----------------------------------------------------------------------------|-------|------|----------|----------|
| R-HSA-8953854 | Reactome Gene Sets      | Metabolism of RNA                                                          | 81    | 8.19 | -24.74   | -20.58   |
| R-HSA-1428517 | Reactome Gene Sets      | Aerobic respiration and respiratory electron transport                     | 43    | 4.35 | -18.42   | -14.68   |
| GO:0007005    | GO Biological Processes | mitochondrion organization                                                 | 53    | 5.36 | -17.7    | -14.06   |
| GO:0033365    | GO Biological Processes | protein localization to organelle                                          | 76    | 7.68 | -16.22   | -12.95   |
| GO:0022613    | GO Biological Processes | ribonucleoprotein complex biogenesis                                       | 53    | 5.36 | -13.81   | -10.85   |
| GO:1903320    | GO Biological Processes | regulation of protein modification by small protein conjugation or removal | 35    | 3.54 | -12.66   | -9.89    |
| hsa05022      | KEGG Pathway            | Pathways of neurodegeneration - multiple diseases                          | 50    | 5.06 | -12.09   | -9.38    |
| GO:0072655    | GO Biological Processes | establishment of protein localization to mitochondrion                     | 19    | 1.92 | -11.38   | -8.76    |
| GO:0010506    | GO Biological Processes | regulation of autophagy                                                    | 41    | 4.15 | -11.38   | -8.76    |
| GO:0006914    | GO Biological Processes | autophagy                                                                  | 39    | 3.94 | -11.27   | -8.67    |
| GO:0030163    | GO Biological Processes | protein catabolic process                                                  | 65    | 6.57 | -11.05   | -8.47    |
| R-HSA-1632852 | Reactome Gene Sets      | Macroautophagy                                                             | 22    | 2.22 | -10.24   | -7.77    |
| GO:0051604    | GO Biological Processes | protein maturation                                                         | 50    | 5.06 | -10.21   | -7.74    |
| R-HSA-8951664 | Reactome Gene Sets      | Neddylation                                                                | 28    | 2.83 | -10.06   | -7.62    |
| GO:0016050    | GO Biological Processes | vesicle organization                                                       | 38    | 3.84 | -9.91    | -7.47    |
| R-HSA-5368286 | Reactome Gene Sets      | Mitochondrial translation initiation                                       | 18    | 1.82 | -9.54    | -7.14    |
| GO:0034655    | GO Biological Processes | nucleobase-containing compound catabolic process                           | 34    | 3.44 | -8.28    | -6       |
| GO:0042273    | GO Biological Processes | ribosomal large subunit biogenesis                                         | 14    | 1.42 | -7.73    | -5.49    |
| R-HSA-199991  | Reactome Gene Sets      | Membrane Trafficking                                                       | 45    | 4.55 | -7.62    | -5.39    |
| GO:0022411    | GO Biological Processes | cellular component disassembly                                             | 31    | 3.13 | -7.56    | -5.34    |

Top 20 clusters with their representative enriched terms (one per cluster). "Count" is the number of genes in the user-provided lists with membership in the given ontology term. "Gene proportion (%)" is the percentage of all of the user-provided genes that are found in the given ontology term (only input genes with at least one ontology term annotation are included in the calculation). "Log10(P)" is the p-value in log base 10. "Log10(q)" is the multi-test adjusted p-value in log base 10.

Supplementary Table S7. Detailed statistical results of gene expression for AD VS. MCI.

| GO            | Category                | Description                                            | Count | %    | Log10(P) | Log10(q) |
|---------------|-------------------------|--------------------------------------------------------|-------|------|----------|----------|
| R-HSA-1428517 | Reactome Gene Sets      | Aerobic respiration and respiratory electron transport | 25    | 4.73 | -11.25   | -6.91    |
| R-HSA-199991  | Reactome Gene Sets      | Membrane Trafficking                                   | 39    | 7.39 | -10.84   | -6.79    |
| GO:0043603    | GO Biological Processes | amide metabolic process                                | 29    | 5.49 | -9.1     | -5.36    |
| GO:0010256    | GO Biological Processes | endomembrane system organization                       | 34    | 6.44 | -8.58    | -5.01    |
| GO:0006605    | GO Biological Processes | protein targeting                                      | 19    | 3.6  | -7.18    | -3.71    |
| GO:0098660    | GO Biological Processes | inorganic ion transmembrane transport                  | 37    | 7.01 | -7.15    | -3.71    |
| R-HSA-9837999 | Reactome Gene Sets      | Mitochondrial protein degradation                      | 12    | 2.27 | -6.93    | -3.59    |
| GO:0051668    | GO Biological Processes | localization within membrane                           | 29    | 5.49 | -6.42    | -3.22    |
| GO:0046434    | GO Biological Processes | organophosphate catabolic process                      | 16    | 3.03 | -6.31    | -3.16    |
| GO:0016042    | GO Biological Processes | lipid catabolic process                                | 20    | 3.79 | -6.29    | -3.16    |
| GO:0019752    | GO Biological Processes | carboxylic acid metabolic process                      | 35    | 6.63 | -6.28    | -3.16    |
| GO:0048193    | GO Biological Processes | Golgi vesicle transport                                | 19    | 3.6  | -5.71    | -2.79    |
| R-HSA-6799198 | Reactome Gene Sets      | Complex I biogenesis                                   | 9     | 1.7  | -5.61    | -2.7     |
| R-HSA-72766   | Reactome Gene Sets      | Translation                                            | 19    | 3.6  | -5.55    | -2.67    |
| hsa04142      | KEGG Pathway            | Lysosome                                               | 12    | 2.27 | -5.4     | -2.54    |
| CORUM:7439    | CORUM                   | ECT2-KIF23-RACGAP1 complex                             | 3     | 0.57 | -5.28    | -2.47    |
| GO:0016197    | GO Biological Processes | endosomal transport                                    | 17    | 3.22 | -5.26    | -2.47    |
| GO:0098657    | GO Biological Processes | import into cell                                       | 30    | 5.68 | -5.04    | -2.3     |
| GO:0007005    | GO Biological Processes | mitochondrion organization                             | 20    | 3.79 | -4.89    | -2.22    |
| R-HSA-5628897 | Reactome Gene Sets      | TP53 Regulates Metabolic Genes                         | 9     | 1.7  | -4.87    | -2.22    |

Supplementary Table S8. The statistical results of the classification between AD and NC for each site.

| Site | Features across all-brains |       |          | Features across sig-brains |       |          | Features across with FDR-brains |       |          |
|------|----------------------------|-------|----------|----------------------------|-------|----------|---------------------------------|-------|----------|
|      | ACC                        | AUC   | F1 score | ACC                        | AUC   | F1 score | ACC                             | AUC   | F1 score |
| S01  | 0.833                      | 0.926 | 0.857    | 0.833                      | 0.899 | 0.841    | 0.774                           | 0.853 | 0.800    |
| S02  | 0.841                      | 0.896 | 0.844    | 0.750                      | 0.884 | 0.792    | 0.841                           | 0.920 | 0.857    |
| S03  | 0.700                      | 0.775 | 0.763    | 0.683                      | 0.751 | 0.740    | 0.700                           | 0.753 | 0.769    |
| S04  | 0.561                      | 0.607 | 0.657    | 0.589                      | 0.616 | 0.645    | 0.495                           | 0.573 | 0.591    |
| S05  | 0.779                      | 0.814 | 0.747    | 0.699                      | 0.787 | 0.653    | 0.717                           | 0.782 | 0.667    |
| S06  | 0.736                      | 0.856 | 0.788    | 0.774                      | 0.859 | 0.800    | 0.755                           | 0.860 | 0.787    |
| S07  | 0.765                      | 0.832 | 0.762    | 0.765                      | 0.820 | 0.737    | 0.788                           | 0.819 | 0.757    |

"ACC" is the classification Accuracy achieved on the respective site. "AUC" means the Area Under the ROC Curve, which measures the model's ability to distinguish between classes across all classification thresholds. The F1 score, which is the harmonic mean of precision and recall.

Supplementary Table S9. The statistical results of the classification between AD and MCI for each site.

| Site | Features across all-brains |       |          | Features across sig-brains |       |          | Features across with FDR-brains |       |          |
|------|----------------------------|-------|----------|----------------------------|-------|----------|---------------------------------|-------|----------|
|      | ACC                        | AUC   | F1 score | ACC                        | AUC   | F1 score | ACC                             | AUC   | F1 score |
| S01  | 0.744                      | 0.797 | 0.804    | 0.705                      | 0.756 | 0.777    | 0.731                           | 0.736 | 0.774    |
| S02  | 0.682                      | 0.677 | 0.720    | 0.591                      | 0.652 | 0.654    | 0.591                           | 0.700 | 0.654    |
| S03  | 0.507                      | 0.620 | 0.575    | 0.536                      | 0.595 | 0.636    | 0.580                           | 0.606 | 0.667    |
| S04  | 0.593                      | 0.601 | 0.703    | 0.568                      | 0.638 | 0.667    | 0.481                           | 0.638 | 0.580    |
| S05  | 0.603                      | 0.746 | 0.569    | 0.617                      | 0.726 | 0.571    | 0.589                           | 0.684 | 0.561    |
| S06  | 0.800                      | 0.819 | 0.833    | 0.700                      | 0.769 | 0.762    | 0.740                           | 0.731 | 0.794    |
| S07  | 0.646                      | 0.743 | 0.702    | 0.633                      | 0.741 | 0.633    | 0.582                           | 0.638 | 0.629    |

Supplementary Table S10. The statistical results of the prediction between AD and NC for each site.

| Site | Features across all-brains |       |       |        | Features across sig-brains |       |       |        | Features across with FDR-brains |       |       |        |
|------|----------------------------|-------|-------|--------|----------------------------|-------|-------|--------|---------------------------------|-------|-------|--------|
|      | MAE                        | RMSE  | r     | p      | MAE                        | RMSE  | r     | p      | MAE                             | RMSE  | r     | p      |
| S01  | 4.258                      | 5.899 | 0.616 | <0.001 | 4.660                      | 5.985 | 0.588 | <0.001 | 5.153                           | 6.517 | 0.471 | <0.001 |
| S02  | 4.183                      | 5.348 | 0.589 | <0.001 | 4.666                      | 6.197 | 0.574 | <0.001 | 4.109                           | 5.525 | 0.591 | <0.001 |
| S03  | 5.617                      | 6.749 | 0.549 | <0.001 | 5.775                      | 7.043 | 0.505 | <0.001 | 6.002                           | 7.343 | 0.385 | 0.002  |
| S04  | 4.572                      | 5.375 | 0.218 | 0.024  | 4.551                      | 5.431 | 0.179 | 0.064  | 4.818                           | 5.734 | 0.104 | 0.289  |
| S05  | 5.165                      | 6.644 | 0.415 | <0.001 | 4.995                      | 6.727 | 0.426 | <0.001 | 5.234                           | 6.892 | 0.391 | <0.001 |
| S06  | 7.539                      | 9.425 | 0.650 | <0.001 | 7.425                      | 9.452 | 0.661 | <0.001 | 7.714                           | 9.914 | 0.630 | <0.001 |
| S07  | 4.913                      | 6.257 | 0.626 | <0.001 | 4.922                      | 6.382 | 0.598 | <0.001 | 5.320                           | 7.004 | 0.552 | <0.001 |

MAE, Mean Absolute Error. RMSE, Root Mean Square Error. r, The correlation coefficient. p, The p-value.



**Supplementary Table S11. The statistical results of the prediction between AD and MCI for each site.**

| Site | Features across all-brains |       |       |        | Features across sig-brains |       |       |        | Features across with FDR-brains |        |       |        |
|------|----------------------------|-------|-------|--------|----------------------------|-------|-------|--------|---------------------------------|--------|-------|--------|
|      | MAE                        | RMSE  | r     | p      | MAE                        | RMSE  | r     | p      | MAE                             | RMSE   | r     | p      |
| S01  | 5.011                      | 6.238 | 0.447 | <0.001 | 5.237                      | 6.624 | 0.282 | 0.013  | 5.279                           | 6.688  | 0.240 | 0.034  |
| S02  | 4.895                      | 5.876 | 0.311 | 0.040  | 5.378                      | 6.453 | 0.307 | 0.043  | 5.024                           | 6.209  | 0.341 | 0.023  |
| S03  | 5.178                      | 6.198 | 0.393 | <0.001 | 5.177                      | 6.502 | 0.242 | 0.045  | 5.228                           | 6.545  | 0.230 | 0.058  |
| S04  | 3.681                      | 4.469 | 0.056 | 0.622  | 3.076                      | 3.830 | 0.064 | 0.571  | 2.861                           | 3.672  | 0.051 | 0.656  |
| S05  | 4.675                      | 5.705 | 0.326 | <0.001 | 4.284                      | 5.466 | 0.370 | <0.001 | 4.345                           | 5.731  | 0.304 | <0.001 |
| S06  | 7.676                      | 9.213 | 0.506 | <0.001 | 8.245                      | 9.794 | 0.300 | 0.034  | 8.493                           | 10.166 | 0.282 | 0.047  |
| S07  | 5.224                      | 6.517 | 0.547 | <0.001 | 5.108                      | 6.387 | 0.562 | <0.001 | 5.175                           | 6.394  | 0.433 | <0.001 |

**Supplementary Table S12. Brainnetome atlas.**

The human Brainnetome Atlas was employed. The atlas was derived from a parcellation approach based on connectivity information and has been used in brain network studies. The atlas consists of 246 subregions in the cerebrum (210 cortical and 36 subcortical regions) (<http://atlas.brainnetome.org>). Before we extracted the mean regional time series, any voxel with an amplitude value less than 0.05 and any area where there was no fMRI signal recorded from one or more participants was excluded from the study. This resulted in a set of 246 regional areas of the Brainnetome Atlas being included for further analysis. The detailed information of 246 regions was listed as follows.

| Lobe          | Gyrus                        | Left and Right Hemisphere | Label ID.L | Label ID.R | Anatomical and modified Cyto-architectonic descriptions | lh.MNI(X,Y,Z) | rh.MNI(X,Y,Z) |
|---------------|------------------------------|---------------------------|------------|------------|---------------------------------------------------------|---------------|---------------|
| Frontal Lobe  | SFG, Superior Frontal Gyrus  | SFG_L(R)_7_1              | 1          | 2          | A8m, medial area 8                                      | -5 ,15, 54    | 7, 16, 54     |
|               |                              | SFG_L(R)_7_2              | 3          | 4          | A8dl, dorsolateral area 8                               | -18, 24, 53   | 22, 26, 51    |
|               |                              | SFG_L(R)_7_3              | 5          | 6          | A9l, lateral area 9                                     | -11, 49, 40   | 13, 48, 40    |
|               |                              | SFG_L(R)_7_4              | 7          | 8          | A6dl, dorsolateral area 6                               | -18, -1, 65   | 20, 4, 64     |
|               |                              | SFG_L(R)_7_5              | 9          | 10         | A6m, medial area 6                                      | -6, -5, 58    | 7, -4, 60     |
|               |                              | SFG_L(R)_7_6              | 11         | 12         | A9m, medial area 9                                      | -5, 36, 38    | 6, 38, 35     |
|               |                              | SFG_L(R)_7_7              | 13         | 14         | A10m, medial area 10                                    | -8, 56, 15    | 8, 58, 13     |
|               | MFG, Middle Frontal Gyrus    | MFG_L(R)_7_1              | 15         | 16         | A9/46d, dorsal area 9/46                                | -27, 43, 31   | 30, 37, 36    |
|               |                              | MFG_L(R)_7_2              | 17         | 18         | IFJ, inferior frontal junction                          | -42, 13, 36   | 42, 11, 39    |
|               |                              | MFG_L(R)_7_3              | 19         | 20         | A46, area 46                                            | -28, 56, 12   | 28, 55, 17    |
|               |                              | MFG_L(R)_7_4              | 21         | 22         | A9/46v, ventral area 9/46                               | -41, 41, 16   | 42, 44, 14    |
|               |                              | MFG_L(R)_7_5              | 23         | 24         | A8vl, ventrolateral area 8                              | -33, 23, 45   | 42, 27, 39    |
|               |                              | MFG_L(R)_7_6              | 25         | 26         | A6vl, ventrolateral area 6                              | -32, 4, 55    | 34, 8, 54     |
|               |                              | MFG_L(R)_7_7              | 27         | 28         | A10l, lateral area10                                    | -26, 60, -6   | 25, 61, -4    |
|               | IFG, Inferior Frontal Gyrus  | IFG_L(R)_6_1              | 29         | 30         | A44d, dorsal area 44                                    | -46, 13, 24   | 45, 16, 25    |
|               |                              | IFG_L(R)_6_2              | 31         | 32         | IFS, inferior frontal sulcus                            | -47, 32, 14   | 48, 35, 13    |
|               |                              | IFG_L(R)_6_3              | 33         | 34         | A45c, caudal area 45                                    | -53, 23, 11   | 54, 24, 12    |
|               |                              | IFG_L(R)_6_4              | 35         | 36         | A45r, rostral area 45                                   | -49, 36, -3   | 51, 36, -1    |
|               |                              | IFG_L(R)_6_5              | 37         | 38         | A44op, opercular area 44                                | -39, 23, 4    | 42, 22, 3     |
|               |                              | IFG_L(R)_6_6              | 39         | 40         | A44v, ventral area 44                                   | -52, 13, 6    | 54, 14, 11    |
|               | OrG, Orbital Gyrus           | OrG_L(R)_6_1              | 41         | 42         | A14m, medial area 14                                    | -7, 54, -7    | 6, 47, -7     |
|               |                              | OrG_L(R)_6_2              | 43         | 44         | A12/47o, orbital area 12/47                             | -36, 33, -16  | 40, 39, -14   |
|               |                              | OrG_L(R)_6_3              | 45         | 46         | A11l, lateral area 11                                   | -23, 38, -18  | 23, 36, -18   |
|               |                              | OrG_L(R)_6_4              | 47         | 48         | A11m, medial area 11                                    | -6, 52, -19   | 6, 57, -16    |
|               |                              | OrG_L(R)_6_5              | 49         | 50         | A13, area 13                                            | -10, 18, -19  | 9, 20, -19    |
|               |                              | OrG_L(R)_6_6              | 51         | 52         | A12/47l, lateral area 12/47                             | -41, 32, -9   | 42, 31, -9    |
|               | PrG, Precentral Gyrus        | PrG_L(R)_6_1              | 53         | 54         | A4hf, area 4(head and face region)                      | -49, -8, 39   | 55, -2, 33    |
|               |                              | PrG_L(R)_6_2              | 55         | 56         | A6cdl, caudal dorsolateral area 6                       | -32, -9, 58   | 33, -7, 57    |
|               |                              | PrG_L(R)_6_3              | 57         | 58         | A4ul, area 4(upper limb region)                         | -26, -25, 63  | 34, -19, 59   |
|               |                              | PrG_L(R)_6_4              | 59         | 60         | A4t, area 4(trunk region)                               | -13, -20, 73  | 15, -22, 71   |
|               |                              | PrG_L(R)_6_5              | 61         | 62         | A4tl, area 4(tongue and larynx region)                  | -52, 0, 8     | 54, 4, 9      |
|               |                              | PrG_L(R)_6_6              | 63         | 64         | A6cvl, caudal ventrolateral area 6                      | -49, 5, 30    | 51, 7, 30     |
|               | PCL, Paracentral Lobule      | PCL_L(R)_2_1              | 65         | 66         | A1/2/3ll, area1/2/3 (lower limb region)                 | -8, -38, 58   | 10, -34, 54   |
|               |                              | PCL_L(R)_2_2              | 67         | 68         | A4ll, area 4, (lower limb region)                       | -4, -23, 61   | 5, -21, 61    |
| Temporal Lobe | STG, Superior Temporal Gyrus | STG_L(R)_6_1              | 69         | 70         | A38m, medial area 38                                    | -32, 14, -34  | 31, 15, -34   |
|               |                              | STG_L(R)_6_2              | 71         | 72         | A41/42, area 41/42                                      | -54, -32, 12  | 54, -24, 11   |
|               |                              | STG_L(R)_6_3              | 73         | 74         | TE1.0 and TE1.2                                         | -50, -11, 1   | 51, -4, -1    |
|               |                              | STG_L(R)_6_4              | 75         | 76         | A22c, caudal area 22                                    | -62, -33, 7   | 66, -20, 6    |

|               |                                          |               |     |     |                                                             |               |              |
|---------------|------------------------------------------|---------------|-----|-----|-------------------------------------------------------------|---------------|--------------|
|               |                                          | STG_L(R)_6_5  | 77  | 78  | A38l, lateral area 38                                       | -45, 11, -20  | 47, 12, -20  |
|               |                                          | STG_L(R)_6_6  | 79  | 80  | A22r, rostral area 22                                       | -55, -3, -10  | 56, -12, -5  |
|               | MTG, Middle Temporal Gyrus               | MTG_L(R)_4_1  | 81  | 82  | A21c, caudal area 21                                        | -65, -30, -12 | 65, -29, -13 |
|               |                                          | MTG_L(R)_4_2  | 83  | 84  | A21r, rostral area 21                                       | -53, 2, -30   | 51, 6, -32   |
|               |                                          | MTG_L(R)_4_3  | 85  | 86  | A37dl, dorsolateral area37                                  | -59, -58, 4   | 60, -53, 3   |
|               |                                          | MTG_L(R)_4_4  | 87  | 88  | aSTS, anterior superior temporal sulcus                     | -58, -20, -9  | 58, -16, -10 |
|               |                                          |               |     |     |                                                             |               |              |
|               | ITG, Inferior Temporal Gyrus             | ITG_L(R)_7_1  | 89  | 90  | A20iv, intermediate ventral area 20                         | -45, -26, -27 | 46, -14, -33 |
|               |                                          | ITG_L(R)_7_2  | 91  | 92  | A37elv, extreme lateroventral area37                        | -51, -57, -15 | 53, -52, -18 |
|               |                                          | ITG_L(R)_7_3  | 93  | 94  | A20r, rostral area 20                                       | -43, -2, -41  | 40, 0, -43   |
|               |                                          | ITG_L(R)_7_4  | 95  | 96  | A20il, intermediate lateral area 20                         | -56, -16, -28 | 55, -11, -32 |
|               |                                          | ITG_L(R)_7_5  | 97  | 98  | A37vl, ventrolateral area 37                                | -55, -60, -6  | 54, -57, -8  |
|               |                                          | ITG_L(R)_7_6  | 99  | 100 | A20cl, caudolateral of area 20                              | -59, -42, -16 | 61, -40, -17 |
|               |                                          | ITG_L(R)_7_7  | 101 | 102 | A20cv, caudoventral of area 20                              | -55, -31, -27 | 54, -31, -26 |
|               | FuG, Fusiform Gyrus                      | FuG_L(R)_3_1  | 103 | 104 | A20rv, rostroventral area 20                                | -33, -16, -32 | 33, -15, -34 |
|               |                                          | FuG_L(R)_3_2  | 105 | 106 | A37mv, medioventral area37                                  | -31, -64, -14 | 31, -62, -14 |
|               |                                          | FuG_L(R)_3_3  | 107 | 108 | A37lv, lateroventral area37                                 | -42, -51, -17 | 43, -49, -19 |
|               | PhG, Parahippocampal Gyrus               | PhG_L(R)_6_1  | 109 | 110 | A35/36r, rostral area 35/36                                 | -27, -7, -34  | 28, -8, -33  |
|               |                                          | PhG_L(R)_6_2  | 111 | 112 | A35/36c, caudal area 35/36                                  | -25, -25, -26 | 26, -23, -27 |
|               |                                          | PhG_L(R)_6_3  | 113 | 114 | TL, area TL (lateral PPHC, posterior parahippocampal gyrus) | -28, -32, -18 | 30, -30, -18 |
|               |                                          | PhG_L(R)_6_4  | 115 | 116 | A28/34, area 28/34 (EC, entorhinal cortex)                  | -19, -12, -30 | 19, -10, -30 |
|               |                                          | PhG_L(R)_6_5  | 117 | 118 | TI, area TI(temporal agranular insular cortex)              | -23, 2, -32   | 22, 1, -36   |
|               |                                          | PhG_L(R)_6_6  | 119 | 120 | TH, area TH (medial PPHC)                                   | -17, -39, -10 | 19, -36, -11 |
|               | pSTS, posterior Superior Temporal Sulcus | pSTS_L(R)_2_1 | 121 | 122 | rpSTS, rostoposterior superior temporal sulcus              | -54, -40, 4   | 53, -37, 3   |
|               |                                          | pSTS_L(R)_2_2 | 123 | 124 | cpSTS, caudoposterior superior temporal sulcus              | -52, -50, 11  | 57, -40, 12  |
| Parietal Lobe | SPL, Superior Parietal Lobule            | SPL_L(R)_5_1  | 125 | 126 | A7r, rostral area 7                                         | -16, -60, 63  | 19, -57, 65  |
|               |                                          | SPL_L(R)_5_2  | 127 | 128 | A7c, caudal area 7                                          | -15, -71, 52  | 19, -69, 54  |
|               |                                          | SPL_L(R)_5_3  | 129 | 130 | A5l, lateral area 5                                         | -33, -47, 50  | 35, -42, 54  |
|               |                                          | SPL_L(R)_5_4  | 131 | 132 | A7pc, postcentral area 7                                    | -22, -47, 65  | 23, -43, 67  |
|               |                                          | SPL_L(R)_5_5  | 133 | 134 | A7ip, intraparietal area 7(hIP3)                            | -27, -59, 54  | 31, -54, 53  |
|               | IPL, Inferior Parietal Lobule            | IPL_L(R)_6_1  | 135 | 136 | A39c, caudal area 39(PGp)                                   | -34, -80, 29  | 45, -71, 20  |
|               |                                          | IPL_L(R)_6_2  | 137 | 138 | A39rd, rostrrodorsal area 39(Hip3)                          | -38, -61, 46  | 39, -65, 44  |
|               |                                          | IPL_L(R)_6_3  | 139 | 140 | A40rd, rostrrodorsal area 40(PFt)                           | -51, -33, 42  | 47, -35, 45  |
|               |                                          | IPL_L(R)_6_4  | 141 | 142 | A40c, caudal area 40(PFm)                                   | -56, -49, 38  | 57, -44, 38  |
|               |                                          | IPL_L(R)_6_5  | 143 | 144 | A39rv, rostroventral area 39(PGa)                           | -47, -65, 26  | 53, -54, 25  |
|               |                                          | IPL_L(R)_6_6  | 145 | 146 | A40rv, rostroventral area 40(PFop)                          | -53, -31, 23  | 55, -26, 26  |
|               | Pcun, Precuneus                          | PCun_L(R)_4_1 | 147 | 148 | A7m, medial area 7(PEp)                                     | -5, -63, 51   | 6, -65, 51   |
|               |                                          | PCun_L(R)_4_2 | 149 | 150 | A5m, medial area 5(PEm)                                     | -8, -47, 57   | 7, -47, 58   |
|               |                                          | PCun_L(R)_4_3 | 151 | 152 | dmPOS, dorsomedial parietooccipital sulcus(PEr)             | -12, -67, 25  | 16, -64, 25  |
|               |                                          | PCun_L(R)_4_4 | 153 | 154 | A31, area 31 (Lc1)                                          | -6, -55, 34   | 6, -54, 35   |
|               | PoG, Postcentral Gyrus                   | PoG_L(R)_4_1  | 155 | 156 | A1/2/3ulhf, area 1/2/3(upper limb, head and face region)    | -50, -16, 43  | 50, -14, 44  |
|               |                                          | PoG_L(R)_4_2  | 157 | 158 | A1/2/3tonla, area 1/2/3(tongue and larynx region)           | -56, -14, 16  | 56, -10, 15  |
|               |                                          | PoG_L(R)_4_3  | 159 | 160 | A2, area 2                                                  | -46, -30, 50  | 48, -24, 48  |
|               |                                          | PoG_L(R)_4_4  | 161 | 162 | A1/2/3tru, area1/2/3(trunk region)                          | -21, -35, 68  | 20, -33, 69  |
| Insular Lobe  | INS, Insular Gyrus                       | INS_L(R)_6_1  | 163 | 164 | G, hypergranular insula                                     | -36, -20, 10  | 37, -18, 8   |
|               |                                          | INS_L(R)_6_2  | 165 | 166 | vIa, ventral agranular insula                               | -32, 14, -13  | 33, 14, -13  |
|               |                                          | INS_L(R)_6_3  | 167 | 168 | dIa, dorsal agranular insula                                | -34, 18, 1    | 36, 18, 1    |
|               |                                          | INS_L(R)_6_4  | 169 | 170 | vId/vIg, ventral dysgranular and granular insula            | -38, -4, -9   | 39, -2, -9   |
|               |                                          | INS_L(R)_6_5  | 171 | 172 | dIg, dorsal granular insula                                 | -38, -8, 8    | 39, -7, 8    |
|               |                                          | INS_L(R)_6_6  | 173 | 174 | dId, dorsal dysgranular insula                              | -38, 5, 5     | 38, 5, 5     |

|                           |                                      |                |     |     |                                             |               |              |
|---------------------------|--------------------------------------|----------------|-----|-----|---------------------------------------------|---------------|--------------|
| <b>Limbic Lobe</b>        | CG, Cingulate Gyrus                  | CG_L(R)_7_1    | 175 | 176 | A23d, dorsal area 23                        | -4, -39, 31   | 4, -37, 32   |
|                           |                                      | CG_L(R)_7_2    | 177 | 178 | A24rv, rostroventral area 24                | -3, 8, 25     | 5, 22, 12    |
|                           |                                      | CG_L(R)_7_3    | 179 | 180 | A32p, pregenual area 32                     | -6, 34, 21    | 5, 28, 27    |
|                           |                                      | CG_L(R)_7_4    | 181 | 182 | A23v, ventral area 23                       | -8, -47, 10   | 9, -44, 11   |
|                           |                                      | CG_L(R)_7_5    | 183 | 184 | A24cd, caudodorsal area 24                  | -5, 7, 37     | 4, 6, 38     |
|                           |                                      | CG_L(R)_7_6    | 185 | 186 | A23c, caudal area 23                        | -7, -23, 41   | 6, -20, 40   |
|                           |                                      | CG_L(R)_7_7    | 187 | 188 | A32sg, subgenual area 32                    | -4, 39, -2    | 5, 41, 6     |
| <b>Occipital Lobe</b>     | MVOcC, MedioVentral Occipital Cortex | MVOcC_L(R)_5_1 | 189 | 190 | cLinG, caudal lingual gyrus                 | -11, -82, -11 | 10, -85, -9  |
|                           |                                      | MVOcC_L(R)_5_2 | 191 | 192 | rCunG, rostral cuneus gyrus                 | -5, -81, 10   | 7, -76, 11   |
|                           |                                      | MVOcC_L(R)_5_3 | 193 | 194 | cCunG, caudal cuneus gyrus                  | -6, -94, 1    | 8, -90, 12   |
|                           |                                      | MVOcC_L(R)_5_4 | 195 | 196 | rLinG, rostral lingual gyrus                | -17, -60, -6  | 18, -60, -7  |
|                           |                                      | MVOcC_L(R)_5_5 | 197 | 198 | vmPOS, ventromedial parietooccipital sulcus | -13, -68, 12  | 15, -63, 12  |
|                           | LOcC, lateral Occipital Cortex       | LOcC_L(R)_4_1  | 199 | 200 | mOccG, middle occipital gyrus               | -31, -89, 11  | 34, -86, 11  |
|                           |                                      | LOcC_L(R)_4_2  | 201 | 202 | V5/MT+, area V5/MT+                         | -46, -74, 3   | 48, -70, -1  |
|                           |                                      | LOcC_L(R)_4_3  | 203 | 204 | OPC, occipital polar cortex                 | -18, -99, 2   | 22, -97, 4   |
|                           |                                      | LOcC_L(R)_4_4  | 205 | 206 | iOccG, inferior occipital gyrus             | -30, -88, -12 | 32, -85, -12 |
|                           |                                      | LOcC_L(R)_2_1  | 207 | 208 | msOccG, medial superior occipital gyrus     | -11, -88, 31  | 16, -85, 34  |
|                           |                                      | LOcC_L(R)_2_2  | 209 | 210 | lsOccG, lateral superior occipital gyrus    | -22, -77, 36  | 29, -75, 36  |
| <b>Subcortical Nuclei</b> | Amyg, Amygdala                       | Amyg_L(R)_2_1  | 211 | 212 | mAmyg, medial amygdala                      | -19, -2, -20  | 19, -2, -19  |
|                           |                                      | Amyg_L(R)_2_2  | 213 | 214 | lAmyg, lateral amygdala                     | -27, -4, -20  | 28, -3, -20  |
|                           | Hipp, Hippocampus                    | Hipp_L(R)_2_1  | 215 | 216 | rHipp, rostral hippocampus                  | -22, -14, -19 | 22, -12, -20 |
|                           |                                      | Hipp_L(R)_2_2  | 217 | 218 | cHipp, caudal hippocampus                   | -28, -30, -10 | 29, -27, -10 |
|                           | BG, Basal Ganglia                    | BG_L(R)_6_1    | 219 | 220 | vCa, ventral caudate                        | -12, 14, 0    | 15, 14, -2   |
|                           |                                      | BG_L(R)_6_2    | 221 | 222 | GP, globus pallidus                         | -22, -2, 4    | 22, -2, 3    |
|                           |                                      | BG_L(R)_6_3    | 223 | 224 | NAC, nucleus accumbens                      | -17, 3, -9    | 15, 8, -9    |
|                           |                                      | BG_L(R)_6_4    | 225 | 226 | vmPu, ventromedial putamen                  | -23, 7, -4    | 22, 8, -1    |
|                           |                                      | BG_L(R)_6_5    | 227 | 228 | dCa, dorsal caudate                         | -14, 2, 16    | 14, 5, 14    |
|                           |                                      | BG_L(R)_6_6    | 229 | 230 | dIPu, dorsolateral putamen                  | -28, -5, 2    | 29, -3, 1    |
|                           | Tha, Thalamus                        | Tha_L(R)_8_1   | 231 | 232 | mPFtha, medial pre-frontal thalamus         | -7, -12, 5    | 7, -11, 6    |
|                           |                                      | Tha_L(R)_8_2   | 233 | 234 | mPMtha, pre-motor thalamus                  | -18, -13, 3   | 12, -14, 1   |
|                           |                                      | Tha_L(R)_8_3   | 235 | 236 | Stha, sensory thalamus                      | -18, -23, 4   | 18, -22, 3   |
|                           |                                      | Tha_L(R)_8_4   | 237 | 238 | rTtha, rostral temporal thalamus            | -7, -14, 7    | 3, -13, 5    |
|                           |                                      | Tha_L(R)_8_5   | 239 | 240 | PPtha, posterior parietal thalamus          | -16, -24, 6   | 15, -25, 6   |
|                           |                                      | Tha_L(R)_8_6   | 241 | 242 | Otha, occipital thalamus                    | -15, -28, 4   | 13, -27, 8   |
|                           |                                      | Tha_L(R)_8_7   | 243 | 244 | cTtha, caudal temporal thalamus             | -12, -22, 13  | 10, -14, 14  |
|                           |                                      | Tha_L(R)_8_8   | 245 | 246 | IPFtha, lateral pre-frontal thalamus        | -11, -14, 2   | 13, -16, 7   |
